# Supplementary material for: Ligand-free copper-catalyzed coupling of nitroarenes with arylboronic acids
Source: Royal Society of Chemistry journal article supplement (doi:10.1039/c2gc16539b), 2012-01-01
Supplement: c2gc16539b.pdf [file c2gc16539b.pdf]

## Supporting Information

### Ligand-free copper-catalyzed coupling of nitroarenes with arylboronic acids

Jilei Zhang, Jiuxi Chen,\* Miaochang Liu, Xingwang Zheng, Jinchang Ding and Huayue Wu\*

College of Chemistry & Materials Engineering, Wenzhou University, Wenzhou 325035, P. R. China

Email: [jiuxichen@wzu.edu.cn](mailto:jiuxichen@wzu.edu.cn); [huayuewu@wzu.edu.cn](mailto:huayuewu@wzu.edu.cn)

### List of Contents

|                                                                                       |        |
|---------------------------------------------------------------------------------------|--------|
| 1. General experimental details.....                                                  | S2     |
| 2. General procedure.....                                                             | S2-S3  |
| 3. The <sup>18</sup> O-labeled experiments determined by GC-MS and HRMS analysis..... | S4-S8  |
| 4. Analytical data for products.....                                                  | S9-S14 |
| 5. Copies of product <sup>1</sup> H NMR and <sup>13</sup> C NMR.....                  | S15-38 |

## 1. General experimental details

Chemicals were either purchased or purified by standard techniques without special instructions.  $^1\text{H}$  NMR and  $^{13}\text{C}$  NMR spectra were measured on a 300 MHz or 500 MHz Bruker spectrometer, using  $\text{CDCl}_3$  as the solvent with tetramethylsilane (TMS) as the internal standard at room temperature. Chemical shifts are given in  $\delta$  relative to TMS, the coupling constants  $J$  are given in Hz. All reactions were conducted under air atmosphere. Column chromatography was performed using EM Silica gel 60 (300-400 mesh). All products are known compounds and identified by comparison with authentic samples. Analytical data and spectra ( $^1\text{H}$  and  $^{13}\text{C}$  NMR) of all compounds are supplied in the Supporting Information.

## 2. General procedure

### 2.1 Typical Experimental Procedure for the ligand-free copper-catalyzed coupling of nitroarenes with arylboronic acids:

Under air atmosphere, a Schlenk tube was charged with nitroarenes (0.6 mmol), arylboronic acids (0.3 mmol), nano CuO (5 mol%) or  $\text{Cu}(\text{OAc})_2$  (5 mol%), Oxone (1 equiv) and  $\text{Cs}_2\text{CO}_3$  (0.9 mmol) in 3 mL of DMF at room temperature. After that, the mixture was stirred constantly at 100 °C (oil bath temperature) for 48 h. After the completion of the reaction, as monitored by TLC and GC-MS analysis, the reaction mixture was cooled to room temperature, diluted with ethyl acetate, and washed with brine. The aqueous phase was re-extracted with ethyl acetate. The combined organic extracts were dried over  $\text{Na}_2\text{SO}_4$  and concentrated under vacuum, and the resulting residue was purified by silica gel column chromatography to afford the desired product **3**.

## 2.2 Screening Optimal Conditions

**Table S1** Screening the optimal conditions<sup>a</sup>

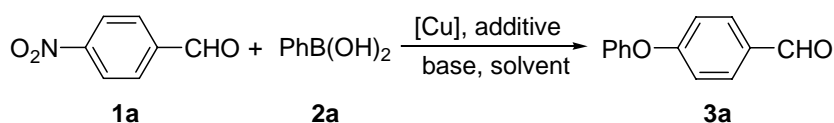

| Entry | Cu sources           | Base                            | Solvent                         | Additive | Yield (%) <sup>b</sup> |
|-------|----------------------|---------------------------------|---------------------------------|----------|------------------------|
| 1     | Cu(OAc) <sub>2</sub> | Na <sub>2</sub> CO <sub>3</sub> | DMF                             | -        | 27                     |
| 2     | Cu(OAc) <sub>2</sub> | K <sub>2</sub> CO <sub>3</sub>  | DMF                             | -        | 46                     |
| 3     | Cu(OAc) <sub>2</sub> | CsOAc                           | DMF                             | -        | 34                     |
| 4     | Cu(OAc) <sub>2</sub> | CsF                             | DMF                             | -        | 29                     |
| 5     | Cu(OAc) <sub>2</sub> | LiF                             | DMF                             | -        | 28                     |
| 6     | Cu(OAc) <sub>2</sub> | NaOH                            | DMF                             | -        | 14                     |
| 7     | Cu(OAc) <sub>2</sub> | K <sub>3</sub> PO <sub>4</sub>  | DMF                             | -        | trace                  |
| 8     | Cu(OAc) <sub>2</sub> | DABCO                           | DMF                             | -        | trace                  |
| 9     | Cu(OAc) <sub>2</sub> | Cs <sub>2</sub> CO <sub>3</sub> | CH <sub>2</sub> Cl <sub>2</sub> | -        | trace                  |
| 10    | Cu(OAc) <sub>2</sub> | Cs <sub>2</sub> CO <sub>3</sub> | THF                             | -        | trace                  |
| 11    | Cu(OAc) <sub>2</sub> | Cs <sub>2</sub> CO <sub>3</sub> | toluene                         | -        | trace                  |
| 12    | Cu(OAc) <sub>2</sub> | Cs <sub>2</sub> CO <sub>3</sub> | xylene                          | -        | trace                  |
| 13    | Cu(OAc) <sub>2</sub> | Cs <sub>2</sub> CO <sub>3</sub> | PhCl                            | -        | trace                  |
| 14    | Cu(OAc) <sub>2</sub> | Cs <sub>2</sub> CO <sub>3</sub> | CH <sub>3</sub> CN              | -        | trace                  |

<sup>a</sup>Reaction conditions: *p*-nitrobenzaldehyde (0.6 mmol), phenylboronic acid (0.3 mmol), Cu source (5 mol%), base (3 equiv), additive (1 equiv) and solvent (3 ml), air, 100 °C, 48 h.

<sup>b</sup>Isolated yield.

## 2.3 Reaction of 4-nitrobenzaldehyde with phenols

**Table S2** Reaction of 4-nitrobenzaldehyde with phenols<sup>a</sup>

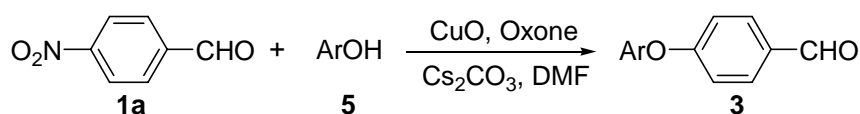

| Entry | ArOH ( <b>5</b> )                               | Product   | Yield (%) <sup>b</sup> |
|-------|-------------------------------------------------|-----------|------------------------|
| 1     | PhOH                                            | <b>3a</b> | 86                     |
| 2     | <i>p</i> -(Me)C <sub>6</sub> H <sub>4</sub> OH  | <b>3b</b> | 88                     |
| 3     | <i>o</i> -(Me)C <sub>6</sub> H <sub>4</sub> OH  | <b>3d</b> | 85                     |
| 4     | <i>p</i> -(OMe)C <sub>6</sub> H <sub>4</sub> OH | <b>3e</b> | 89                     |
| 5     | <i>p</i> -(F)C <sub>6</sub> H <sub>4</sub> OH   | <b>3g</b> | 71                     |
| 6     | <i>p</i> -(Cl)C <sub>6</sub> H <sub>4</sub> OH  | <b>3h</b> | 84                     |

<sup>a</sup>Reaction conditions: **1a** (0.6 mmol), **5** (0.3 mmol), nano CuO (5 mol%), Cs<sub>2</sub>CO<sub>3</sub> (3 equiv), oxone (1 equiv) and DMF (3 ml), air, 100 °C, 48 h. <sup>b</sup>Isolated yield.



|        |        |       |        |          |       |        |         |        |
|--------|--------|-------|--------|----------|-------|--------|---------|--------|
| 89.05  | 28742  | 2.28  | 133.00 | 246      | 0.02  | 178.00 | 82      | 0.01   |
| 90.05  | 4030   | 0.32  | 134.00 | 201      | 0.02  | 179.00 | 146     | 0.01   |
| 91.05  | 22317  | 1.77  | 135.00 | 209      | 0.02  | 180.00 | 89      | 0.01   |
| 92.05  | 23734  | 1.88  | 136.00 | 154      | 0.01  | 180.95 | 11810   | 0.09   |
| 93.05  | 21168  | 1.68  | 137.05 | 1835     | 0.15  | 181.90 | 332     | 0.03   |
| 94.05  | 40694  | 3.23  | 138.15 | 3584     | 0.28  | 182.95 | 596     | 0.05   |
| 95.05  | 3329   | 0.26  | 139.05 | 96814    | 7.68  | 184.00 | 326     | 0.03   |
| 96.05  | 960    | 0.08  | 140.15 | 25242    | 2.00  | 185.00 | 188     | 0.01   |
| 97.55  | 1577   | 0.13  | 141.10 | 679991   | 53.92 | 186.00 | 50      | 0.00   |
| 98.55  | 18967  | 1.50  | 142.10 | 103487   | 8.21  | 187.00 | 49      | 0.00   |
| 99.50  | 33708  | 2.67  | 143.10 | 71190.56 |       | 188.00 | 34      | 0.00   |
| 100.45 | 2868   | 0.23  | 144.00 | 1054     | 0.08  | 189.00 | 22      | 0.00   |
| 101.05 | 2728   | 0.22  | 145.00 | 450      | 0.04  | 191.00 | 57      | 0.00   |
| 102.05 | 9404   | 0.75  | 146.00 | 244      | 0.02  | 192.00 | 14      | 0.00   |
| 103.05 | 3436   | 0.27  | 147.00 | 191      | 0.02  | 193.00 | 42      | 0.00   |
| 104.05 | 3146   | 0.25  | 148.00 | 105      | 0.01  | 194.90 | 1794    | 0.14   |
| 105.05 | 2668   | 0.21  | 149.00 | 302      | 0.02  | 195.95 | 2587    | 0.21   |
| 106.05 | 4827   | 0.38  | 150.00 | 1452     | 0.12  | 196.95 | 621113  | 49.25  |
| 107.05 | 2049   | 0.16  | 151.05 | 7354     | 0.58  | 197.95 | 584765  | 46.37  |
| 108.10 | 343    | 0.03  | 152.05 | 4625     | 0.37  | 198.95 | 1261048 | 100.00 |
| 109.10 | 412    | 0.03  | 153.00 | 2140     | 0.17  | 199.95 | 1104162 | 87.56  |
| 110.00 | 863    | 0.07  | 154.00 | 738      | 0.06  | 200.95 | 156321  | 12.40  |
| 111.05 | 1049   | 0.08  | 155.00 | 1001     | 0.08  | 201.95 | 22697   | 1.80   |
| 112.10 | 599    | 0.05  | 156.00 | 247      | 0.02  | 202.95 | 2146    | 0.17   |
| 113.05 | 11991  | 0.95  | 157.00 | 418      | 0.03  | 203.90 | 220     | 0.02   |
| 114.15 | 14260  | 1.13  | 158.00 | 188      | 0.01  | 204.95 | 483     | 0.04   |
| 115.05 | 485712 | 38.52 | 159.00 | 119      | 0.01  | 206.00 | 71      | 0.01   |
| 116.10 | 50103  | 3.97  | 160.00 | 76       | 0.01  | 207.00 | 58      | 0.00   |
| 117.05 | 2451   | 0.19  | 161.00 | 127      | 0.01  | 208.00 | 34      | 0.00   |
| 118.05 | 740    | 0.06  | 162.00 | 82       | 0.01  | 209.00 | 44      | 0.00   |
| 119.05 | 552    | 0.04  | 163.00 | 90       | 0.01  | 210.00 | 14      | 0.00   |
| 120.00 | 2895   | 0.23  | 164.00 | 98       | 0.01  | 213.00 | 24      | 0.00   |
| 121.00 | 11108  | 0.88  | 165.00 | 145      | 0.01  | 214.00 | 6       | 0.00   |
| 122.05 | 6347   | 0.50  | 167.00 | 4719     | 0.37  | 219.00 | 44      | 0.00   |
| 123.05 | 20482  | 1.62  | 168.00 | 41214    | 3.27  | 220.00 | 110     | 0.01   |
| 124.05 | 1945   | 0.15  | 169.00 | 87321    | 6.92  | 221.00 | 26      | 0.00   |
| 125.05 | 855    | 0.07  | 170.00 | 32745    | 2.60  | 231.00 | 3       | 0.00   |
| 126.05 | 3493   | 0.28  | 171.00 | 35695    | 2.83  | 232.00 | 16      | 0.00   |
| 127.05 | 2705   | 0.21  | 172.00 | 9700     | 0.77  | 246.00 | 13      | 0.00   |
| 128.05 | 2565   | 0.20  | 172.95 | 11110.09 |       | 251.00 | 16      | 0.00   |
| 129.05 | 1312   | 0.10  | 174.00 | 118      | 0.01  | 272.00 | 5       | 0.00   |
| 130.00 | 351    | 0.03  | 175.00 | 58       | 0.00  | 278.00 | 31      | 0.00   |
| 131.05 | 1259   | 0.10  | 176.00 | 54       | 0.00  | 281.00 | 29      | 0.00   |
| 132.00 | 242    | 0.02  | 177.00 | 108      | 0.01  | 294.00 | 5       | 0.00   |

**Figure S2.** GC-MS Analysis of **3a**.

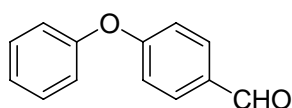

Chemical Formula: C<sub>13</sub>H<sub>10</sub>O<sub>2</sub>

Molecular Weighth: 198

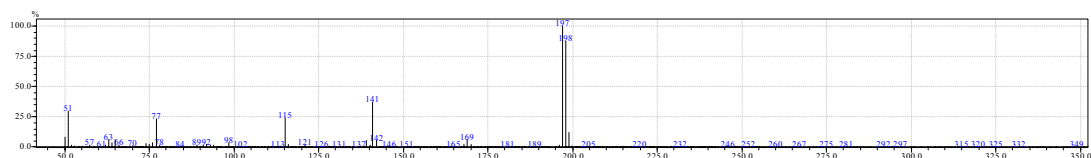

|                     |                     |           |        |        |       |        |          |       |
|---------------------|---------------------|-----------|--------|--------|-------|--------|----------|-------|
|                     |                     |           | 71.95  | 1398   | 0.07  | 105.05 | 4098     | 0.20  |
| [MS Spectrum]       |                     |           | 73.00  | 5815   | 0.28  | 106.00 | 498      | 0.02  |
| # of Peaks          | 414                 |           | 74.00  | 55969  | 2.67  | 107.00 | 110      | 0.01  |
| Raw Spectrum        | 11.892 (scan : 948) |           | 75.00  | 52209  | 2.49  | 108.00 | 98       | 0.00  |
| Background          | No                  |           | 76.00  | 74318  | 3.55  | 109.05 | 348      | 0.02  |
| Background Spectrum |                     |           | 77.00  | 489415 | 23.37 | 109.95 | 838      | 0.04  |
| Base Peak           | m/z                 | 196.95    | 78.00  | 35586  | 1.70  | 111.00 | 1010     | 0.05  |
| (Inten : 2,094,067) |                     |           | 79.00  | 4610   | 0.22  | 112.05 | 667      | 0.03  |
| m/z                 | Absolute            | Intensity | 80.00  | 271    | 0.01  | 113.05 | 12537    | 0.60  |
|                     |                     |           | 81.00  | 86     | 0.00  | 114.05 | 14898    | 0.71  |
|                     | Relative            | Intensity | 82.00  | 90     | 0.00  | 115.05 | 507509   | 24.24 |
| 50.00               | 171740              | 8.20      | 83.15  | 1070   | 0.05  | 116.05 | 52538    | 2.51  |
| 51.00               | 624054              | 29.80     | 84.05  | 12681  | 0.61  | 117.05 | 2663     | 0.13  |
| 52.00               | 34278               | 1.64      | 85.05  | 5327   | 0.25  | 118.05 | 832      | 0.04  |
| 52.95               | 14193               | 0.68      | 85.95  | 5607   | 0.27  | 119.05 | 1502     | 0.07  |
| 54.00               | 1319                | 0.06      | 87.00  | 8241   | 0.39  | 120.00 | 9953     | 0.48  |
| 55.00               | 10135               | 0.48      | 88.05  | 8051   | 0.38  | 121.00 | 39142    | 1.87  |
| 56.55               | 1772                | 0.08      | 89.00  | 36674  | 1.75  | 122.00 | 3686     | 0.18  |
| 57.50               | 35302               | 1.69      | 90.05  | 5261   | 0.25  | 123.00 | 433      | 0.02  |
| 58.45               | 1881                | 0.09      | 91.05  | 29773  | 1.42  | 124.00 | 52       | 0.00  |
| 60.05               | 469                 | 0.02      | 92.00  | 44686  | 2.13  | 125.00 | 572      | 0.03  |
| 61.00               | 8542                | 0.41      | 93.00  | 27866  | 1.33  | 126.00 | 3946     | 0.19  |
| 62.00               | 37338               | 1.78      | 94.00  | 39686  | 1.90  | 127.05 | 3299     | 0.16  |
| 63.00               | 130276              | 6.22      | 95.05  | 2628   | 0.13  | 128.05 | 3047     | 0.15  |
| 64.00               | 69449               | 3.32      | 96.00  | 177    | 0.01  | 129.05 | 19110.09 |       |
| 65.00               | 125636              | 6.00      | 97.55  | 8023   | 0.38  | 130.00 | 476      | 0.02  |
| 66.00               | 32266               | 1.54      | 98.50  | 71798  | 3.43  | 131.00 | 1074     | 0.05  |
| 67.00               | 2737                | 0.13      | 99.45  | 5420   | 0.26  | 132.00 | 151      | 0.01  |
| 68.00               | 3092                | 0.15      | 101.05 | 3082   | 0.15  | 133.00 | 166      | 0.01  |
| 69.05               | 13038               | 0.62      | 102.00 | 11028  | 0.53  | 134.00 | 106      | 0.01  |
| 70.00               | 25449               | 1.22      | 103.05 | 4454   | 0.21  | 135.00 | 175      | 0.01  |
| 70.95               | 11319               | 0.54      | 104.00 | 8628   | 0.41  | 137.05 | 2137     | 0.10  |

|        |        |       |        |         |        |        |    |      |
|--------|--------|-------|--------|---------|--------|--------|----|------|
| 138.05 | 4474   | 0.21  | 184.90 | 89      | 0.00   | 229.90 | 60 | 0.00 |
| 139.00 | 115342 | 5.51  | 185.90 | 58      | 0.00   | 230.90 | 71 | 0.00 |
| 140.15 | 36446  | 1.74  | 186.90 | 42      | 0.00   | 231.90 | 81 | 0.00 |
| 141.05 | 770650 | 36.80 | 187.90 | 29      | 0.00   | 232.90 | 74 | 0.00 |
| 142.05 | 117808 | 5.63  | 188.90 | 60      | 0.00   | 233.90 | 68 | 0.00 |
| 143.05 | 8655   | 0.41  | 189.90 | 18      | 0.00   | 234.90 | 47 | 0.00 |
| 144.00 | 1017   | 0.05  | 190.90 | 55      | 0.00   | 235.90 | 39 | 0.00 |
| 145.00 | 210    | 0.01  | 191.90 | 39      | 0.00   | 236.90 | 39 | 0.00 |
| 146.00 | 76     | 0.00  | 192.90 | 46      | 0.00   | 237.90 | 39 | 0.00 |
| 147.00 | 47     | 0.00  | 194.95 | 5490    | 0.26   | 238.90 | 13 | 0.00 |
| 148.00 | 30     | 0.00  | 196.05 | 33463   | 1.60   | 239.90 | 34 | 0.00 |
| 150.00 | 1340   | 0.06  | 196.95 | 2094067 | 100.00 | 240.90 | 19 | 0.00 |
| 151.00 | 7766   | 0.37  | 197.95 | 1835381 | 87.65  | 241.90 | 26 | 0.00 |
| 152.00 | 5071   | 0.24  | 198.95 | 255263  | 12.19  | 242.90 | 38 | 0.00 |
| 153.05 | 2150   | 0.10  | 199.95 | 24271   | 1.16   | 243.90 | 30 | 0.00 |
| 154.00 | 641    | 0.03  | 200.95 | 1741    | 0.08   | 244.90 | 52 | 0.00 |
| 155.00 | 1262   | 0.06  | 201.90 | 170     | 0.01   | 245.90 | 66 | 0.00 |
| 156.00 | 303    | 0.01  | 202.90 | 71      | 0.00   | 246.90 | 63 | 0.00 |
| 157.00 | 106    | 0.01  | 203.90 | 90      | 0.00   | 247.90 | 49 | 0.00 |
| 158.00 | 44     | 0.00  | 204.90 | 343     | 0.02   | 248.90 | 34 | 0.00 |
| 159.00 | 63     | 0.00  | 205.90 | 63      | 0.00   | 249.90 | 62 | 0.00 |
| 160.00 | 29     | 0.00  | 206.90 | 89      | 0.00   | 250.90 | 70 | 0.00 |
| 161.00 | 31     | 0.00  | 207.90 | 42      | 0.00   | 251.90 | 76 | 0.00 |
| 162.00 | 65     | 0.00  | 208.90 | 62      | 0.00   | 252.90 | 76 | 0.00 |
| 163.00 | 18     | 0.00  | 209.90 | 38      | 0.00   | 253.90 | 11 | 0.00 |
| 164.00 | 46     | 0.00  | 210.90 | 50      | 0.00   | 254.90 | 26 | 0.00 |
| 165.00 | 111    | 0.01  | 211.90 | 33      | 0.00   | 255.90 | 10 | 0.00 |
| 167.05 | 5447   | 0.26  | 212.90 | 38      | 0.00   | 256.90 | 16 | 0.00 |
| 168.00 | 48766  | 2.33  | 213.90 | 26      | 0.00   | 257.90 | 31 | 0.00 |
| 169.00 | 127695 | 6.10  | 214.90 | 55      | 0.00   | 258.90 | 29 | 0.00 |
| 170.00 | 45022  | 2.15  | 215.90 | 33      | 0.00   | 259.90 | 34 | 0.00 |
| 171.00 | 5386   | 0.26  | 216.90 | 60      | 0.00   | 260.90 | 27 | 0.00 |
| 172.00 | 417    | 0.02  | 217.90 | 46      | 0.00   | 261.90 | 26 | 0.00 |
| 173.00 | 81     | 0.00  | 218.90 | 42      | 0.00   | 262.90 | 38 | 0.00 |
| 174.00 | 62     | 0.00  | 219.90 | 103     | 0.00   | 263.90 | 26 | 0.00 |
| 175.00 | 41     | 0.00  | 220.90 | 65      | 0.00   | 264.90 | 54 | 0.00 |
| 176.00 | 29     | 0.00  | 221.90 | 58      | 0.00   | 265.90 | 81 | 0.00 |
| 177.00 | 118    | 0.01  | 222.90 | 31      | 0.00   | 266.90 | 97 | 0.00 |
| 178.00 | 121    | 0.01  | 223.90 | 49      | 0.00   | 269.90 | 47 | 0.00 |
| 179.00 | 146    | 0.01  | 224.90 | 34      | 0.00   | 270.90 | 30 | 0.00 |
| 180.95 | 1933   | 0.09  | 225.90 | 31      | 0.00   | 271.90 | 39 | 0.00 |
| 181.95 | 560    | 0.03  | 226.90 | 65      | 0.00   | 272.90 | 36 | 0.00 |
| 182.90 | 313    | 0.01  | 227.90 | 41      | 0.00   | 273.90 | 47 | 0.00 |
| 183.90 | 214    | 0.01  | 228.90 | 68      | 0.00   | 274.90 | 52 | 0.00 |

**Figure S3.** The  $^{18}\text{O}$ -labeled Experiments Determined by HRMS (ESI) Analysis.

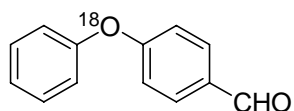

Chemical Formula:  $\text{C}_{13}\text{H}_{10}\text{O}^{18}\text{O}$   
Calcd. for  $\text{C}_{13}\text{H}_{10}\text{O}^{18}\text{O}$   $[\text{M}+\text{H}]^+$  201.0796  
Found:  $m/z$  201.0804

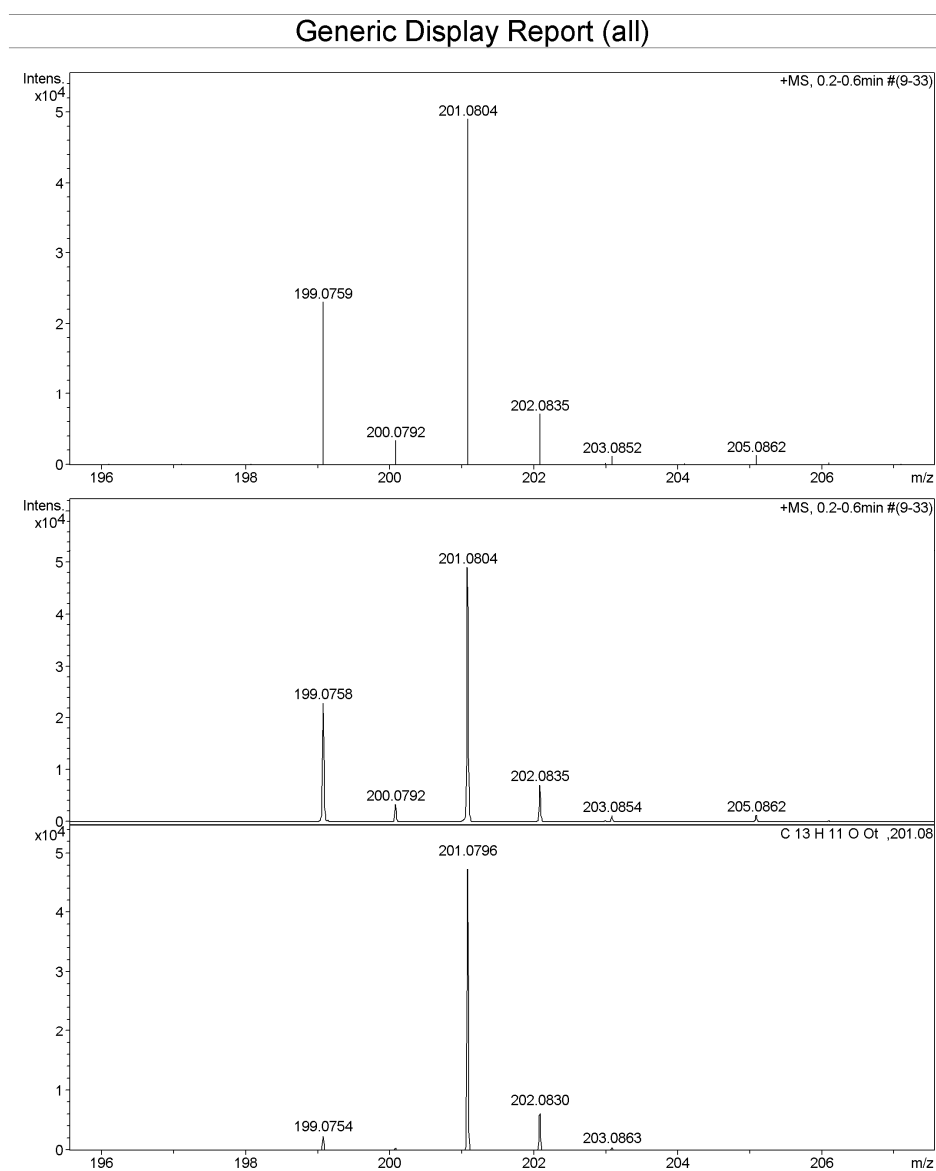



#### 4. Analytical data for products

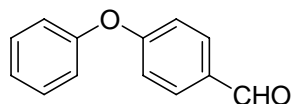

4-Phenoxybenzaldehyde (3a)<sup>1</sup>: <sup>1</sup>H NMR (CDCl<sub>3</sub>, 300 MHz) δ 7.05-7.11 (m, 4H), 7.23-7.25 (m, 1H), 7.39-7.45 (m, 2H), 7.83-7.86 (m, 2H), 9.92 (s, 1H). <sup>13</sup>C NMR (CDCl<sub>3</sub>, 125 MHz) δ 117.6, 120.4, 124.9, 130.1, 131.3, 131.9, 155.1, 163.2, 190.7.

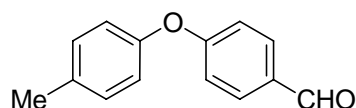

4-(p-Tolyloxy)benzaldehyde (3b)<sup>2</sup>: <sup>1</sup>H NMR (CDCl<sub>3</sub>, 300 MHz) δ 2.37 (s, 3H), 6.97-7.05 (m, 4H), 7.21 (d, *J* = 8.6 Hz, 2H), 7.81-7.84 (m, 2H), 9.91 (s, 1H). <sup>13</sup>C NMR (CDCl<sub>3</sub>, 125 MHz) δ 20.8, 117.2, 120.4, 130.6, 131.0, 131.9, 134.7, 152.7, 163.7, 190.7.

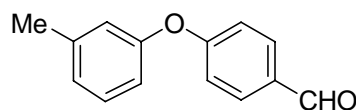

4-(m-Tolyloxy)benzaldehyde (3c)<sup>3</sup>: <sup>1</sup>H NMR (CDCl<sub>3</sub>, 500 MHz) δ 2.36 (s, 3H), 6.87-7.05 (m, 5H), 7.28 (t, *J* = 7.8 Hz, 1H), 7.82-7.85 (m, 2H), 9.91 (s, 1H). <sup>13</sup>C NMR (CDCl<sub>3</sub>, 125 MHz) δ 21.3, 117.3, 117.5, 121.0, 125.7, 129.8, 131.1, 131.9, 140.4, 155.0, 163.3, 190.7.

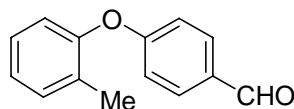

4-(o-Tolyloxy)benzaldehyde (3d)<sup>4</sup>: <sup>1</sup>H NMR (CDCl<sub>3</sub>, 500 MHz) δ 2.18 (s, 3H), 6.95-7.02 (m, 2H), 7.18 (d, *J* = 7.0 Hz, 2H), 7.24 (d, *J* = 8.0 Hz, 1H), 7.30 (d, *J* = 8.0 Hz, 1H), 7.83 (d, *J* = 8.5 Hz, 2H), 9.90 (s, 1H). <sup>13</sup>C NMR (CDCl<sub>3</sub>, 125 MHz) δ 16.0, 116.4, 121.1, 125.5, 127.5, 130.6, 130.9, 131.9, 132.0, 152.7, 163.4, 190.7.

<sup>1</sup> Liu, Y. H.; Li, G.; Yang, L. M. *Tetrahedron. Lett.* **2009**, 50, 343.

<sup>2</sup> Koyama, H.; Julia K.; Boueres, J. K. *Bioorg. Med. Chem. Lett.* **2003**, 13, 1801.

<sup>3</sup> Shimizu, K.; Kizawa, K.; Yoshimoto, T.; Imamura, J. *Sekiyu Gakkaishi* **1982**, 25, 7.

<sup>4</sup> Hu, T. J.; Schulz, T.; Torborg, C.; Chen, X. R.; Wang, J.; Beller, M.; Huang, J. *Chem. Commun.* **2009**, 47, 7330.

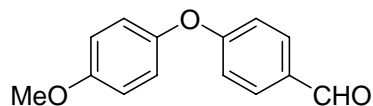

4-(4-Methoxyphenoxy)benzaldehyde (3e)<sup>5</sup>: <sup>1</sup>H NMR (CDCl<sub>3</sub>, 300 MHz) δ 3.82 (s, 3H), 6.91-7.04 (m, 6H), 7.81 (d, *J* = 8.6 Hz, 2H), 9.89 (s, 1H). <sup>13</sup>C NMR (CDCl<sub>3</sub>, 125 MHz) δ 55.6, 115.1, 116.7, 121.8, 130.8, 131.9, 148.1, 156.8, 164.1, 190.7.

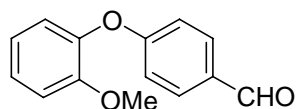

4-(2-Methoxyphenoxy)benzaldehyde (3f)<sup>6</sup>: <sup>1</sup>H NMR (CDCl<sub>3</sub>, 500 MHz) δ 3.78 (s, 3H), 6.97-7.05 (m, 4H), 7.09-7.10 (m, 1H), 7.22-7.25 (m, 1H), 7.80-7.82 (m, 2H), 9.89 (s, 1H). <sup>13</sup>C NMR (CDCl<sub>3</sub>, 125 MHz) δ 55.8, 113.0, 116.2, 121.3, 122.5, 126.4, 130.8, 131.8, 142.8, 151.7, 163.5, 190.7.

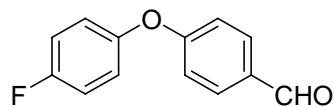

4-(4-Fluorophenoxy)benzaldehyde (3g)<sup>5</sup>: <sup>1</sup>H NMR (CDCl<sub>3</sub>, 300 MHz) δ 7.01-7.14 (m, 6H), 7.84 (d, *J* = 8.7 Hz, 2H), 9.92 (s, 1H). <sup>13</sup>C NMR (CDCl<sub>3</sub>, 125 MHz) δ 116.8 (d, <sup>2</sup>*J*<sub>C-F</sub> = 23.4 Hz, 1C), 117.12, 122.0 (d, <sup>3</sup>*J*<sub>C-F</sub> = 8.8 Hz, 1C), 131.2, 132, 150.7 (d, <sup>4</sup>*J*<sub>C-F</sub> = 3.8 Hz, 1C), 159.7 (d, <sup>1</sup>*J*<sub>C-F</sub> = 242.5 Hz, 1C), 163.3, 190.8.

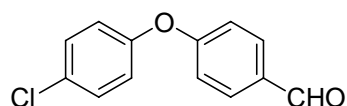

4-(4-Chlorophenoxy)benzaldehyde (3h)<sup>5</sup>: <sup>1</sup>H NMR (CDCl<sub>3</sub>, 300 MHz) δ 7.01-7.07 (m, 4H), 7.36-7.39 (m, 2H), 7.86 (d, *J* = 8.7 Hz, 2H), 9.93 (s, 1H). <sup>13</sup>C NMR (125 MHz) δ 117.7, 121.6, 130.1, 130.2, 131.6, 132.0, 153.8, 162.7, 190.6.

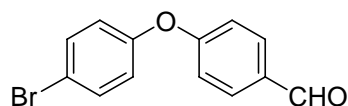

<sup>5</sup> Zheng, X.; Ding, J.; Chen, J.; Gao, W.; Liu, M.; Wu, H. *Org. Lett.* **2011**, 13, 1726.

<sup>6</sup> Ungnade, H. E. *J. Am. Chem. Soc.* **1941**, 63, 2091.

4-(4-Bromophenoxy)benzaldehyde (3i)<sup>7</sup>: <sup>1</sup>H NMR (CDCl<sub>3</sub>, 500 MHz) δ 6.95-7.07 (m, 4H), 7.49-7.52 (m, 2H), 7.83-7.86 (m, 2H), 9.92 (s, 1H). <sup>13</sup>C NMR (CDCl<sub>3</sub>, 125 MHz) δ 117.6, 117.7, 122.0, 131.6, 132.0, 133.1, 154.3, 162.6, 190.7.

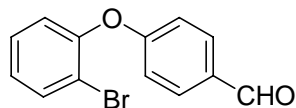

4-(2-Bromophenoxy)benzaldehyde (3j)<sup>8</sup>: <sup>1</sup>H NMR (CDCl<sub>3</sub>, 500 MHz) δ 6.99-7.15 (m, 4H), 7.34-7.38 (m, 1H), 7.66-7.68 (m, 1H), 7.85 (d, *J*=8.7 Hz, 2H), 9.92 (s, 1H). <sup>13</sup>C NMR (CDCl<sub>3</sub>, 125 MHz) δ 116.1, 116.9, 122.6, 126.7, 129.1, 131.5, 131.9, 134.2, 151.7, 162.4, 190.6.

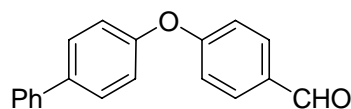

4-(Biphenyl-4-yloxy)benzaldehyde (3k)<sup>9</sup>: <sup>1</sup>H NMR (CDCl<sub>3</sub>, 500 MHz) δ 7.12-7.18 (m, 4H), 7.37 (t, *J*=7.4 Hz, 1H), 7.45-7.48 (m, 2H), 7.59-7.65 (m, 4H), 7.86-7.89 (m, 2H), 9.94 (s, 1H). <sup>13</sup>C NMR (CDCl<sub>3</sub>, 125 MHz) δ 117.7, 120.6, 126.9, 127.3, 128.7, 128.8, 131.4, 131.9, 138.0, 140.1, 154.6, 163.1, 190.7.

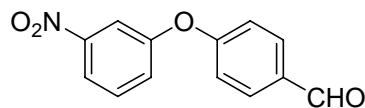

4-(3-Nitrophenoxy)benzaldehyde (3l)<sup>10</sup>: <sup>1</sup>H NMR (CDCl<sub>3</sub>, 500 MHz) δ 7.12-7.14 (m, 2H), 7.40-7.42 (m, 1H), 7.58 (t, *J*=8.2 Hz, 1H), 7.89-8.06 (m, 4H), 9.97 (s, 1H). <sup>13</sup>C NMR (CDCl<sub>3</sub>, 125 MHz) δ 114.7, 118.7, 119.3, 125.7, 130.8, 132.1, 132.5, 149.4, 156.4, 161.3, 190.5.

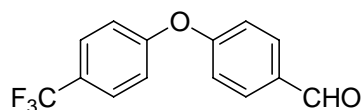

4-(4-(Trifluoromethyl)phenoxy)benzaldehyde<sup>5</sup> (3m): <sup>1</sup>H NMR (CDCl<sub>3</sub>, 500 MHz) δ

<sup>7</sup> Tu, N.; Link, J. T.; Sorensen, B. K. *Bioorg. Med. Chem. Lett.* **2004**, 14, 4179.

<sup>8</sup> Ames, D. E.; Opalko, A. *Tetrahedron* **1984**, 40, 1919.

<sup>9</sup> Igarashi, S.; Kimura, T.; Naito, R.; Hara, H.; Fujii, M.; Koutoku, H.; Oritani, H.; Mase, T. *Chem. Pharm. Bull.* **1999**, 47, 1073.

<sup>10</sup> Marin, L. Cozan, V.; Bruma, M. *Revue Roumaine de Chimie* **2005**, 50, 649.

7.12-7.17 (m, 4H), 7.66 (d,  $J = 8.6$  Hz, 2H), 7.89-7.91 (m, 2H). 9.96 (s, 1H).  $^{13}\text{C}$  NMR ( $\text{CDCl}_3$ , 125 MHz)  $\delta$  118.6, 119.7, 122.8, 125.0, 126.5, 127.4, 127.5, 127.5, 127.5, 1302.0, 132.1, 158.3, 161.6, 190.7.

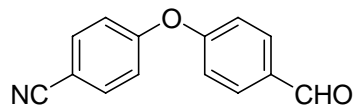

4-(4-Formylphenoxy)benzonitrile (3n)<sup>11</sup>:  $^1\text{H}$  NMR ( $\text{CDCl}_3$ , 500 MHz)  $\delta$  7.11-7.16 (m, 4H), 7.67 (d,  $J=8.2$  Hz, 2H), 7.92 (d,  $J=8.1$  Hz, 2H), 9.97 (s, 1H).  $^{13}\text{C}$  NMR ( $\text{CDCl}_3$ , 125 MHz)  $\delta$  107.7, 118.3, 119.4, 119.6, 132.0, 132.8, 134.4, 159.6, 160.6, 190.4.

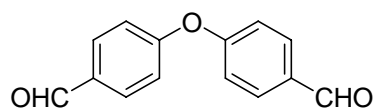

4,4'-Oxydibenzaldehyde (3o)<sup>12</sup>:  $^1\text{H}$  NMR ( $\text{CDCl}_3$ , 500 MHz)  $\delta$  7.17 (d,  $J=8.5$  Hz, 4H), 7.92 (d,  $J=8.7$  Hz, 4H), 9.97 (s, 2H).  $^{13}\text{C}$  NMR ( $\text{CDCl}_3$ , 125 MHz)  $\delta$  119.3, 132.0, 132.6, 161.0, 190.6.

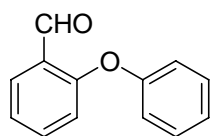

2-Phenoxybenzaldehyde (3p)<sup>13</sup>:  $^1\text{H}$  NMR( $\text{CDCl}_3$ , 500 MHz)  $\delta$  6.90 (d,  $J = 8.3$  Hz, 1H), 7.07 (d,  $J = 7.8$  Hz, 2H), 7.17-7.52 (m, 5H), 7.93-7.95 (m, 1H), 10.52 (s, 1H).  $^{13}\text{C}$  NMR ( $\text{CDCl}_3$ , 125 MHz)  $\delta$  118.4, 119.4, 123.3, 124.3, 126.9, 128.4, 130.1, 135.7, 156.4, 160.0, 189.4.

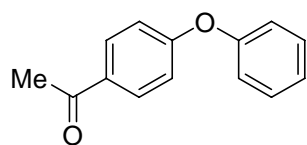

1-(4-Phenoxyphenyl)ethanone (3q)<sup>5</sup>:  $^1\text{H}$  NMR ( $\text{CDCl}_3$ , 500 MHz)  $\delta$  2.57 (s, 3H), 7.00 (d,  $J = 8.5\text{Hz}$ , 2H), 7.07 (d,  $J = 8.5\text{Hz}$ , 2H), 7.20-7.22 (m, 1H), 7.38-7.41(m, 2H),

<sup>11</sup> Lazo, J. S.; Nunes, R.; Skoko, J. J.; Queiroz de Oliveira, P. E.; Vogt, A.; Wipf, P. *Bioorg. Med. Chem.* **2006**, 14, 5643.

<sup>12</sup> Sugimura, R.; Qiao, K.; Tomida, D.; Yokoyama, C. *Catal. Commun.* **2007**, 8, 770.

<sup>13</sup> Fish, P. V.; Ryckmans, T.; Stobie, A.; Wakenhut, F. *Bioorg. Med. Chem. Lett.* **2008**, 18, 1795.

7.94 (d,  $J = 8.5$  Hz, 2H).  $^{13}\text{C}$  NMR ( $\text{CDCl}_3$ , 125 MHz)  $\delta$  26.4, 117.2, 120.2, 124.6, 130.0, 130.6, 131.9, 155.5, 162.0, 196.7.

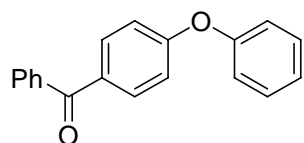

(4-Phenoxyphenyl)(phenyl)methanone (3r)<sup>14</sup>:  $^1\text{H}$  NMR ( $\text{CDCl}_3$ , 500 MHz)  $\delta$  7.02-7.05 (m, 2H), 7.10 (d,  $J = 7.7$ Hz, 2H), 7.20 (t,  $J = 7.5$ Hz, 1H), 7.39-7.42 (m, 2H), 7.46-7.49 (m, 2H), 7.57 (t,  $J = 7.4$ Hz, 1H), 7.78-7.84 (m, 4H).  $^{13}\text{C}$  NMR ( $\text{CDCl}_3$ , 125 MHz)  $\delta$  117.1, 120.1, 124.5, 128.2, 129.7, 130.0, 131.9, 132.0, 132.4, 137.9, 155.5, 161.5, 195.3.

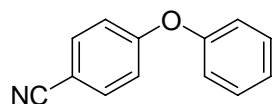

4-Phenoxybenzotrile (3s)<sup>5</sup>:  $^1\text{H}$  NMR ( $\text{CDCl}_3$ , 500 MHz)  $\delta$  6.98-7.01 (m, 2H), 7.05-7.07 (m, 2H), 7.23 (t,  $J = 7.5$ Hz, 1H), 7.39-7.43 (m, 2H), 7.57-7.60 (m, 2H).  $^{13}\text{C}$  NMR ( $\text{CDCl}_3$ , 125 MHz)  $\delta$  105.8, 117.8, 118.7, 120.3, 125.1, 130.1, 134.0, 154.7, 161.6.

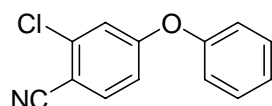

2-Chloro-4-phenoxybenzotrile (3t)<sup>15</sup>:  $^1\text{H}$  NMR ( $\text{CDCl}_3$ , 500 MHz)  $\delta$  6.90-6.92 (m, 1H), 7.03-7.08 (m, 3H), 7.26-7.29 (m, 1H), 7.42-7.46 (m, 2H), 7.58 (d,  $J = 8.7$  Hz, 1H).  $^{13}\text{C}$  NMR ( $\text{CDCl}_3$ , 125 MHz)  $\delta$  106.7, 116.0, 118.4, 120.5, 125.7, 130.4, 135.2, 138.4, 154.1, 162.2.

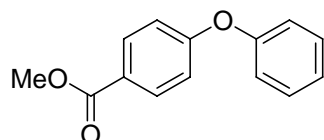

<sup>14</sup> Liu, Y.; Li, G.; Yang, L. *Tetrahedron Lett.* **2009**, 50, 343.

<sup>15</sup> Patel, K. M. *Patent EP 659047 (1993)*.

Methyl 4-phenoxybenzoate (3u)<sup>16</sup>: <sup>1</sup>H NMR (CDCl<sub>3</sub>, 500 MHz) δ 3.90 (s, 3H), 6.98 (d, *J* = 8.8 Hz, 2H), 7.06 (d, *J* = 7.9 Hz, 2H), 7.19 (t, *J* = 7.4 Hz, 1H), 7.37-7.41 (m, 2H), 8.00 (d, *J* = 8.8 Hz, 2H). <sup>13</sup>C NMR (CDCl<sub>3</sub>, 125 MHz) δ 52.0, 117.3, 120.1, 124.5, 130.0, 131.7, 155.6, 161.8, 166.6.

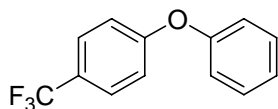

1-Phenoxy-4-(trifluoromethyl)benzene (3v)<sup>17</sup>: <sup>1</sup>H NMR (CDCl<sub>3</sub>, 500 MHz) δ 7.04-7.07 (m, 4H), 7.20 (d, *J* = 7.5 Hz, 1H), 7.38-7.41 (m, 2H), 7.57 (d, *J* = 8.5 Hz, 2H). <sup>13</sup>C NMR (CDCl<sub>3</sub>, 125 MHz) δ 117.9, 119.9, 123.1, 124.5, 124.7, 125.0, 125.3, 127.0, 127.1, 127.1, 127.2, 130.1, 155.7, 160.5.

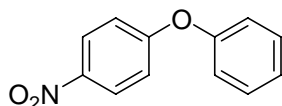

1-Nitro-4-phenoxybenzene (3w)<sup>18</sup>: <sup>1</sup>H NMR (CDCl<sub>3</sub>, 500 MHz) δ 6.99-7.10 (m, 4H), 7.26 (t, *J* = 7.5 Hz, 1H), 7.41-7.45 (m, 2H), 8.18-8.21 (m, 2H). <sup>13</sup>C NMR (CDCl<sub>3</sub>, 125 MHz) δ 117.1, 120.5, 125.4, 125.9, 130.3, 142.6, 154.7, 163.3.

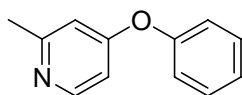

2-Methyl-4-phenoxybenzopyridine (3x)<sup>19</sup>: <sup>1</sup>H NMR (CDCl<sub>3</sub>, 500 MHz) δ 2.48 (s, 3H), 6.63-6.68 (m, 2H), 7.07 (d, *J* = 7.7 Hz, 2H), 7.23 (t, *J* = 7.5 Hz, 1H), 7.39-7.42 (m, 2H), 8.32 (d, *J* = 5.7 Hz, 1H). <sup>13</sup>C NMR (CDCl<sub>3</sub>, 125 MHz) δ 24.5, 109.6, 111.3, 120.7, 125.2, 130.1, 150.6, 154.2, 160.4, 165.1.

<sup>16</sup> Hu, T.; Schulz, T.; Torborg, C.; Chen, X.; Wang, J.; Beller, M.; Huang, J. *Chem. Commun.* **2009**, 7330.

<sup>17</sup> Liu, T.; Shen, Q. *Org. Lett.* **2011**, 13, 2342.

<sup>18</sup> Tlili, A.; Monnier, F.; Taillefer, M. *Chem. Eur. J.* **2010**, 16, 12299.

<sup>19</sup> Fujikawa, K.; Kondo, K.; Yokomichi, I.; Kimura, F.; Haga, T.; Nishiyama, R. *Agric. Bio. Chem.* **1970**, 34, 68.

## 5. Copies of product $^1\text{H}$ NMR and $^{13}\text{C}$ NMR

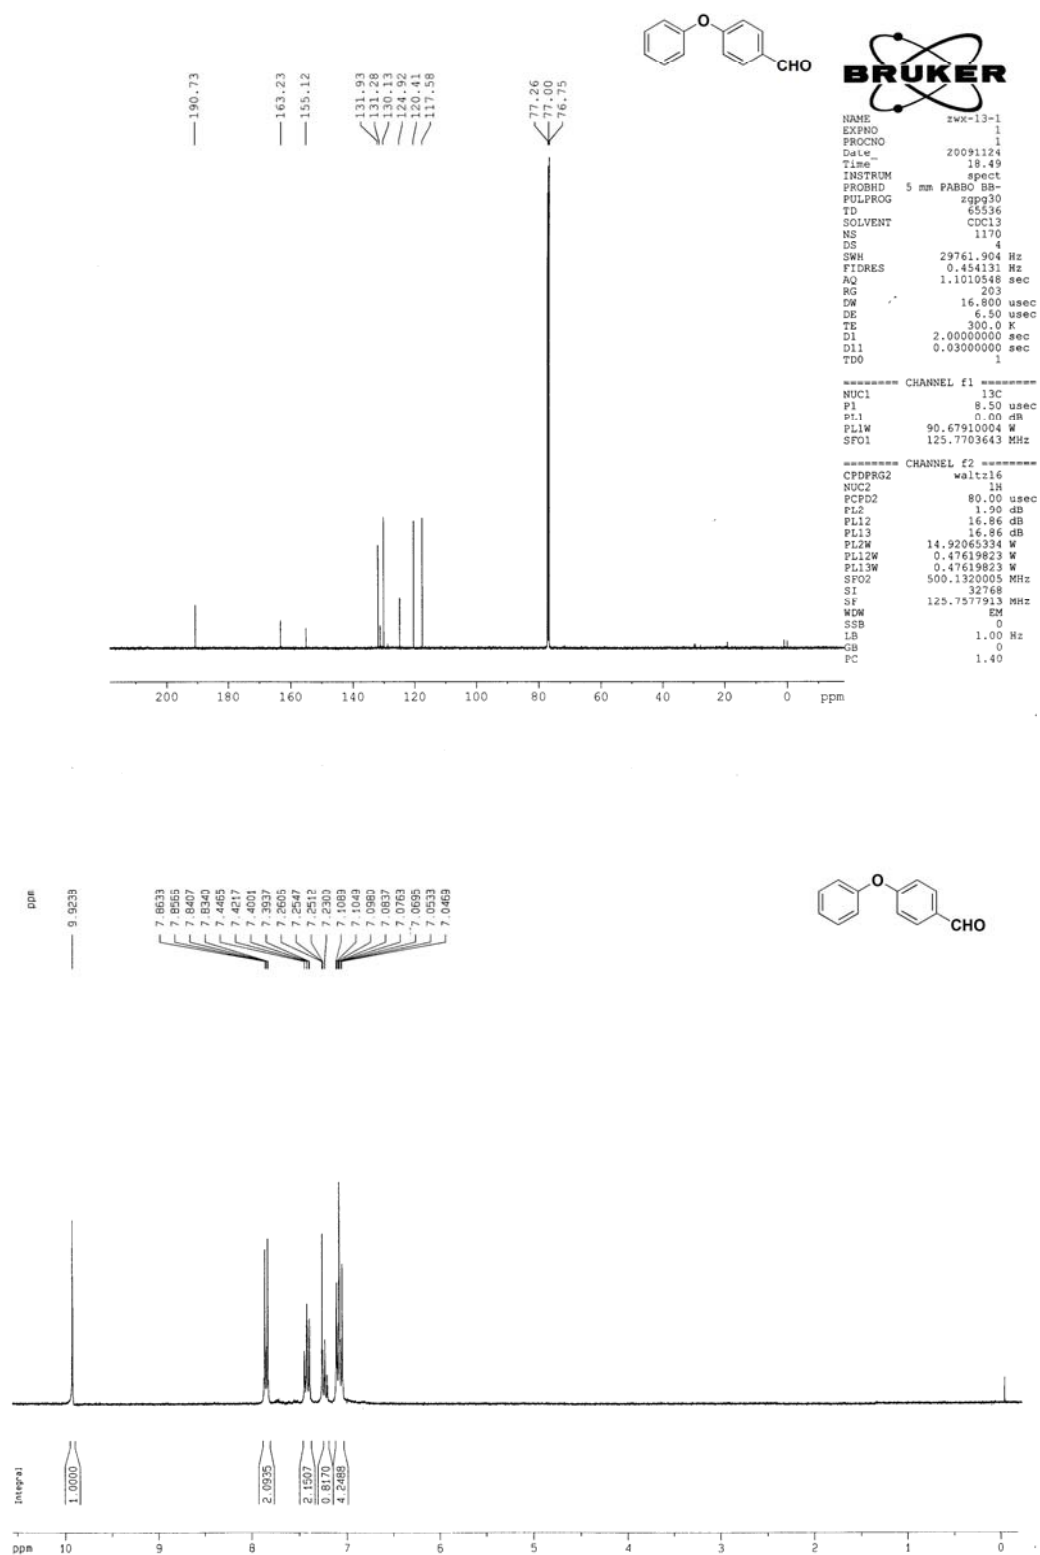

**Figure S4.**  $^1\text{H}$  NMR of **3a** (300 MHz,  $\text{CDCl}_3$ ) and  $^{13}\text{C}$  NMR of **3a** (125 MHz,  $\text{CDCl}_3$ ).

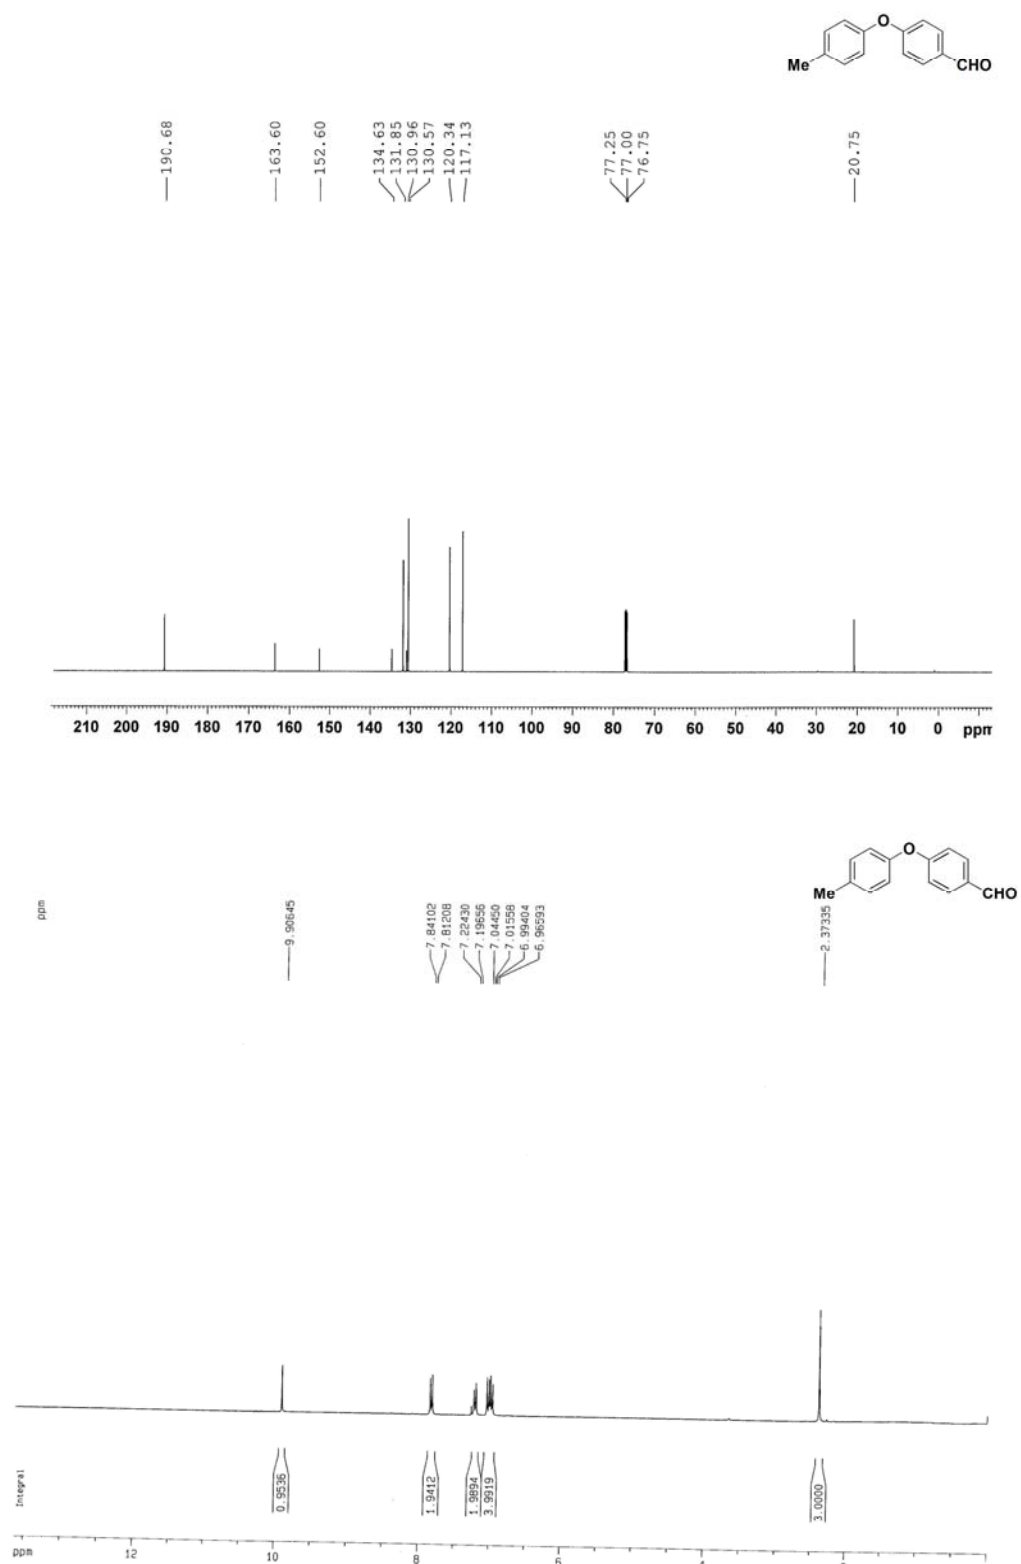

Figure S5. <sup>1</sup>H NMR of **3b** (300 MHz, CDCl<sub>3</sub>) and <sup>13</sup>C NMR of **3b** (125 MHz, CDCl<sub>3</sub>).





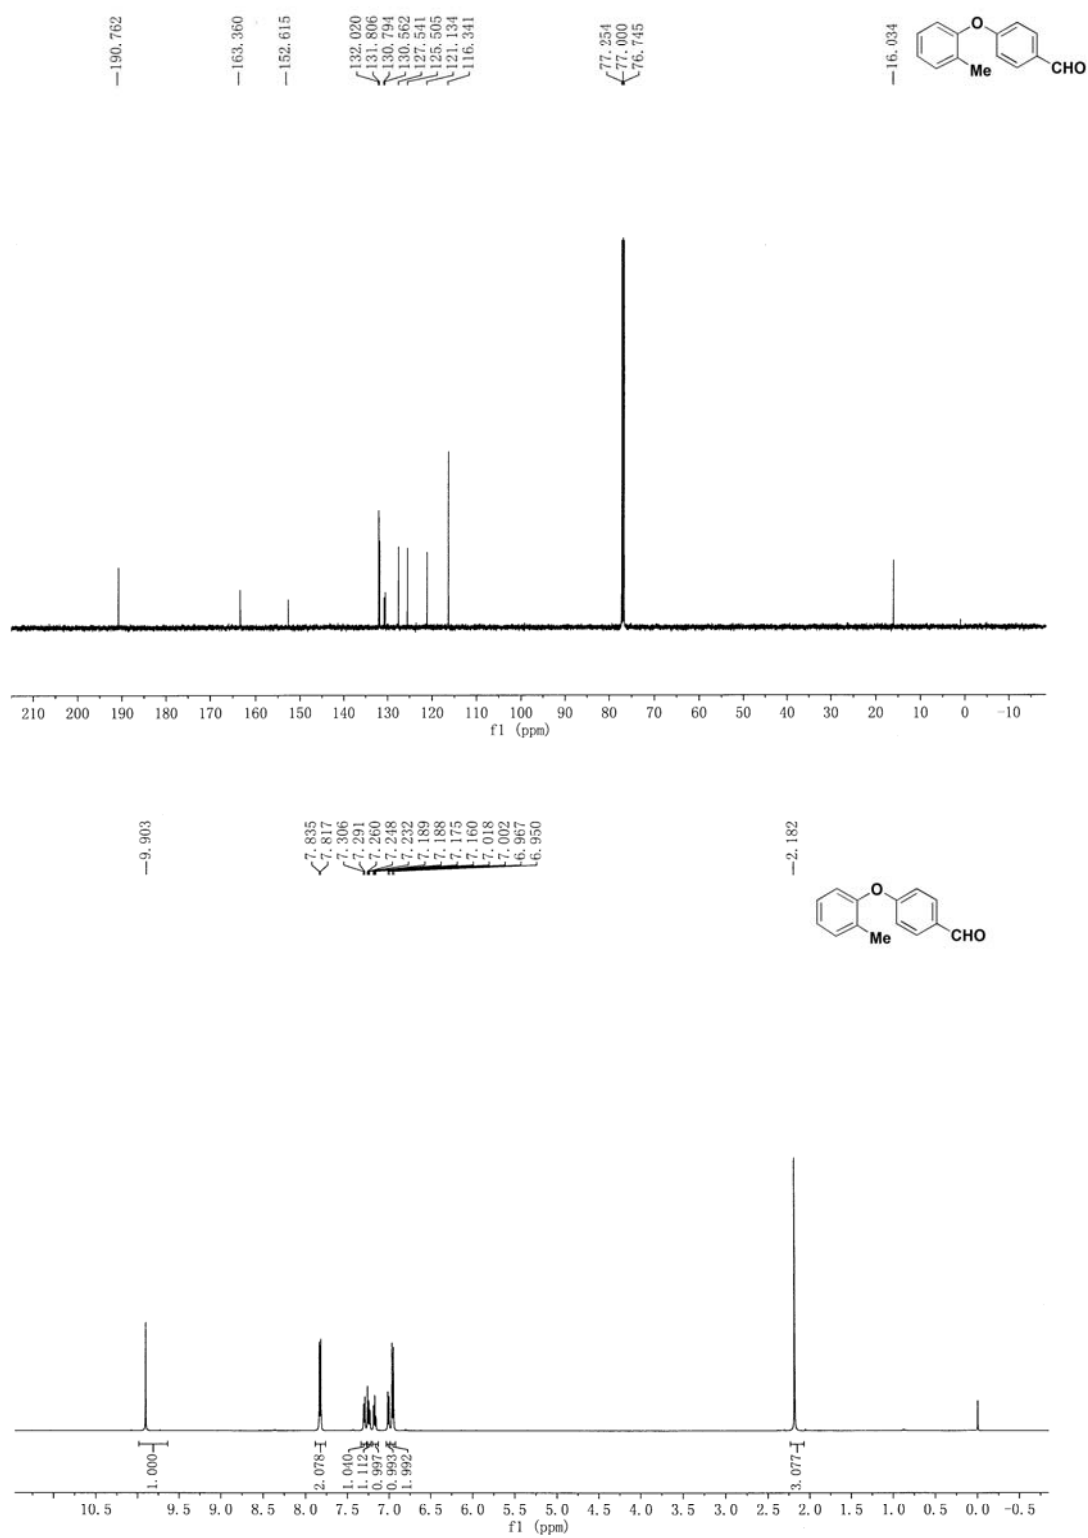

Figure S7. <sup>1</sup>H NMR of **3d** (500 MHz, CDCl<sub>3</sub>) and <sup>13</sup>C NMR of **3d** (125 MHz, CDCl<sub>3</sub>).

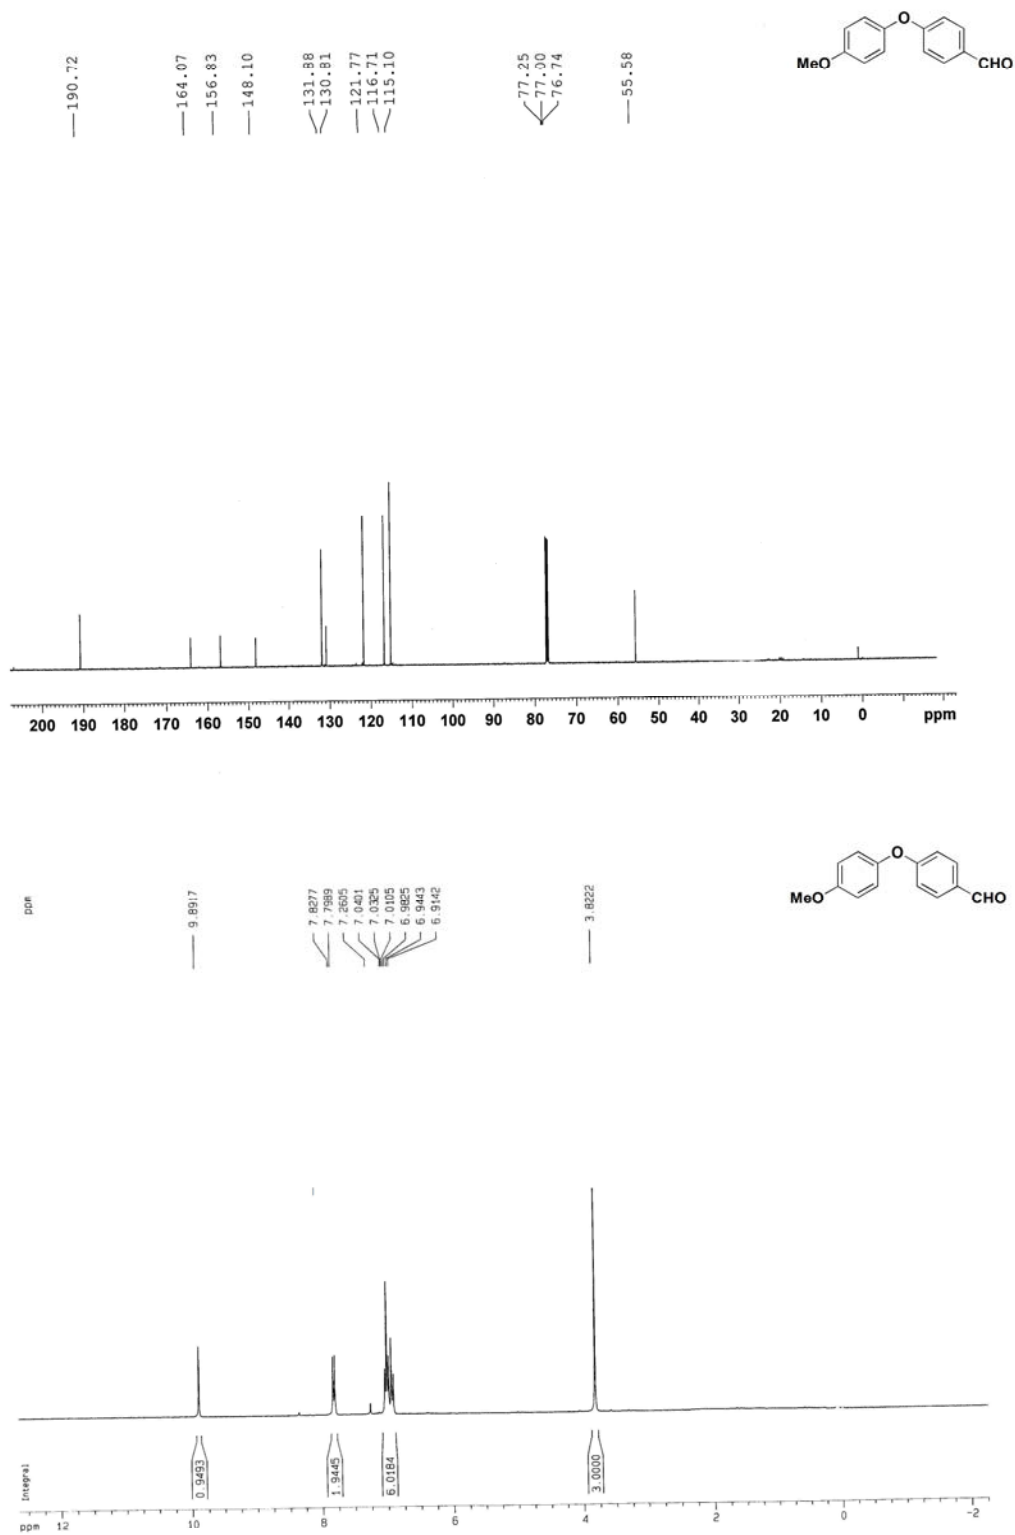

**Figure S8.** <sup>1</sup>H NMR of **3e** (300 MHz, CDCl<sub>3</sub>) and <sup>13</sup>C NMR of **3e** (125 MHz, CDCl<sub>3</sub>).

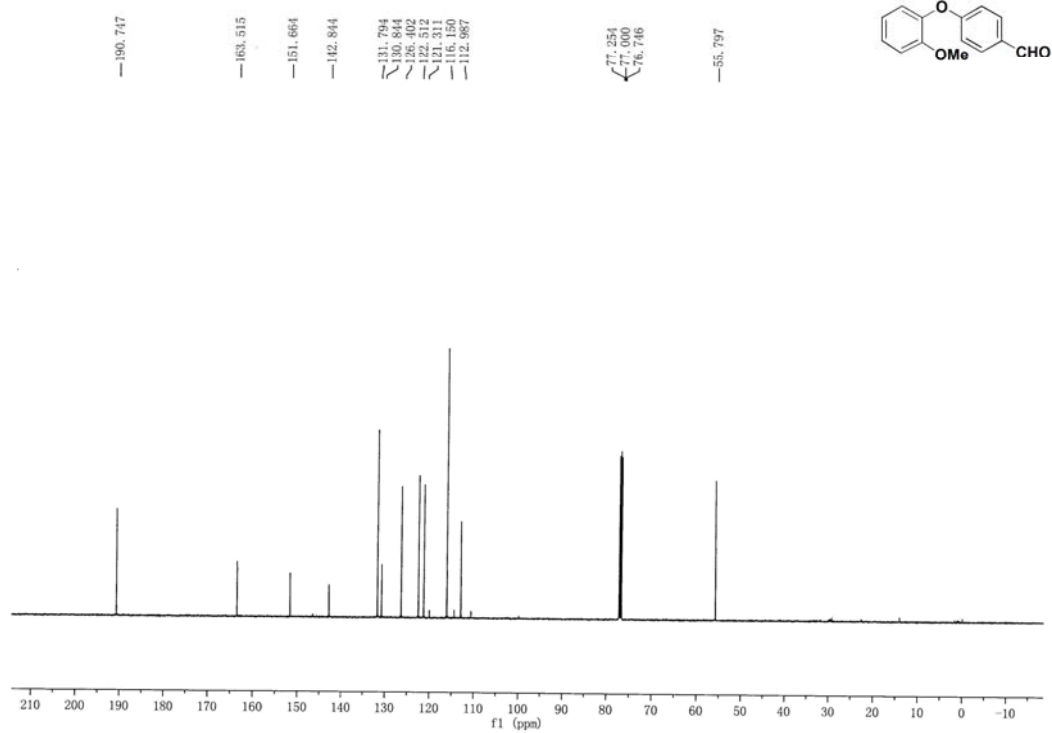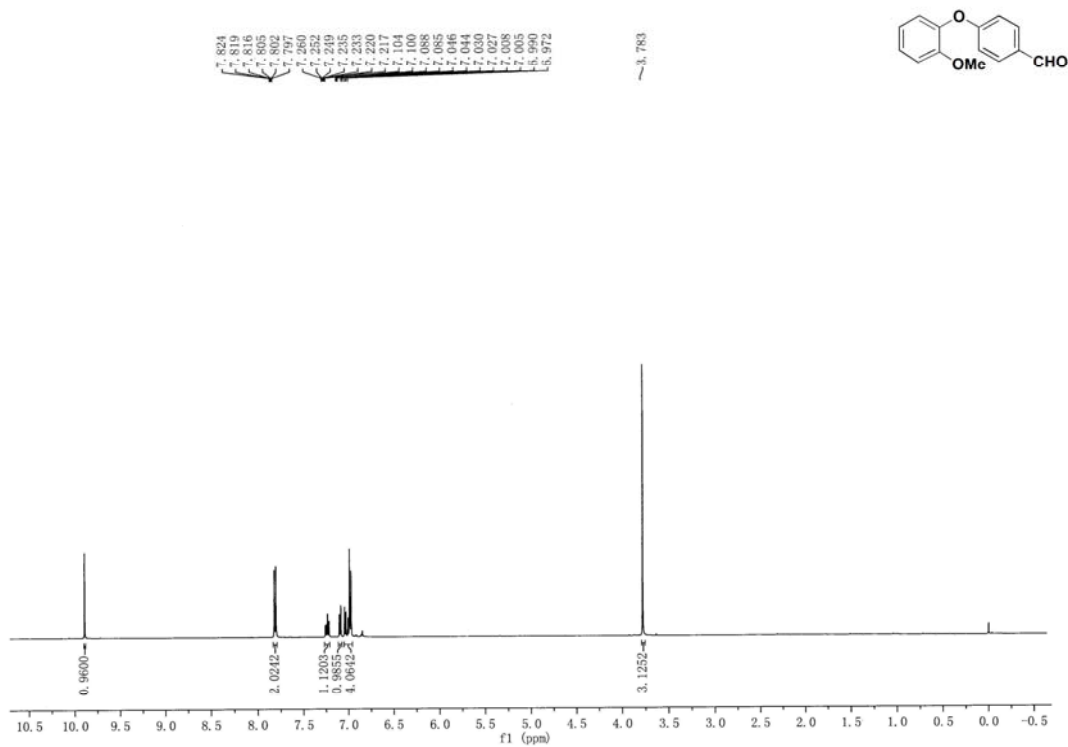

Figure S9. <sup>1</sup>H NMR of **3f** (500 MHz, CDCl<sub>3</sub>) and <sup>13</sup>C NMR of **3f** (125 MHz, CDCl<sub>3</sub>).

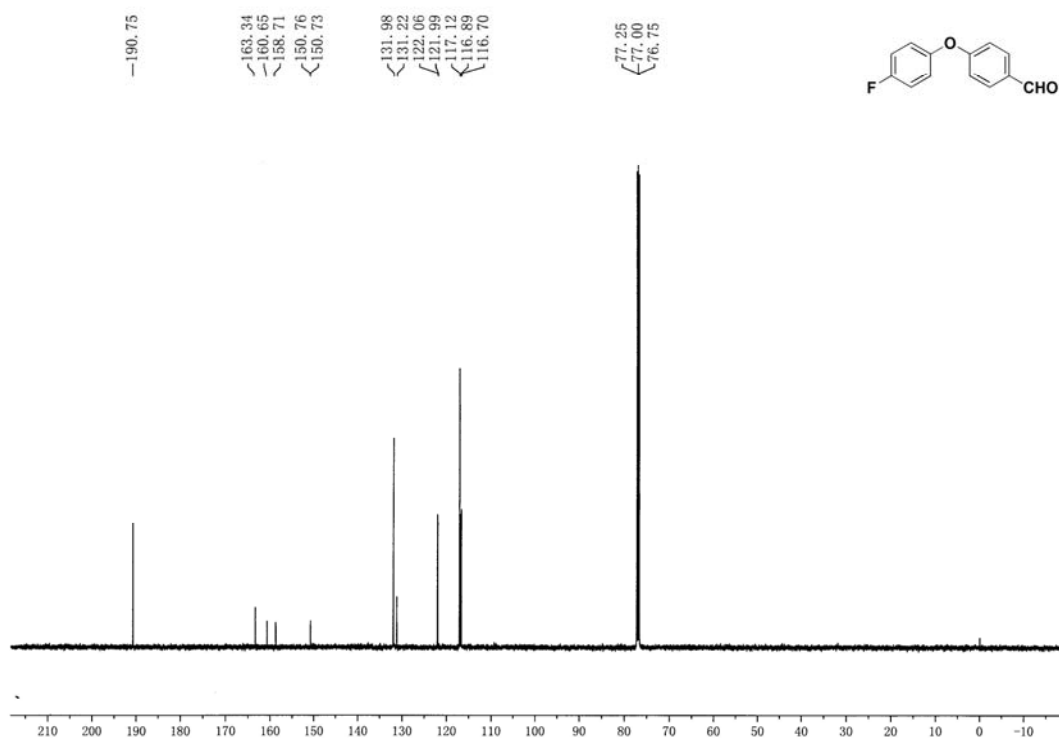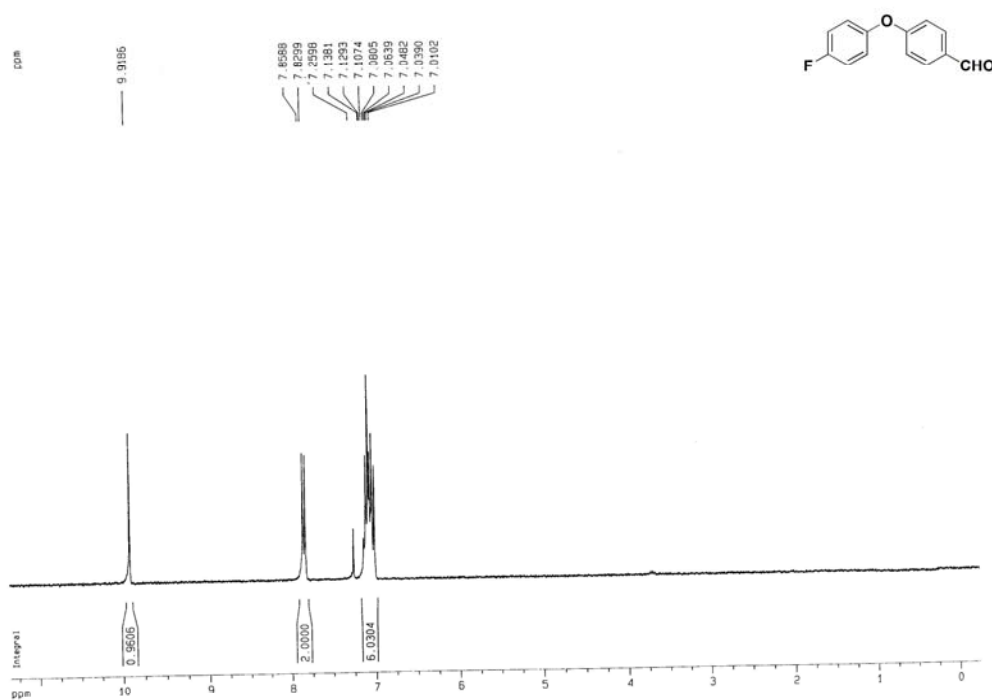

Figure S10. <sup>1</sup>H NMR of **3g** (300 MHz, CDCl<sub>3</sub>) and <sup>13</sup>C NMR of **3g** (125 MHz, CDCl<sub>3</sub>).

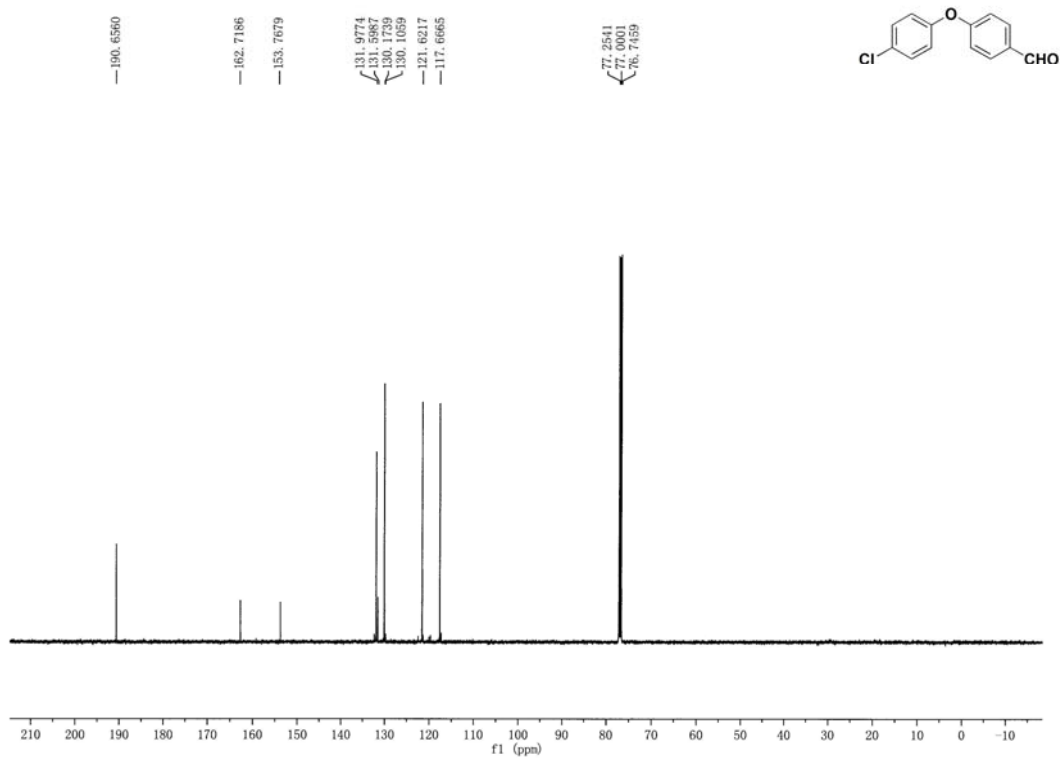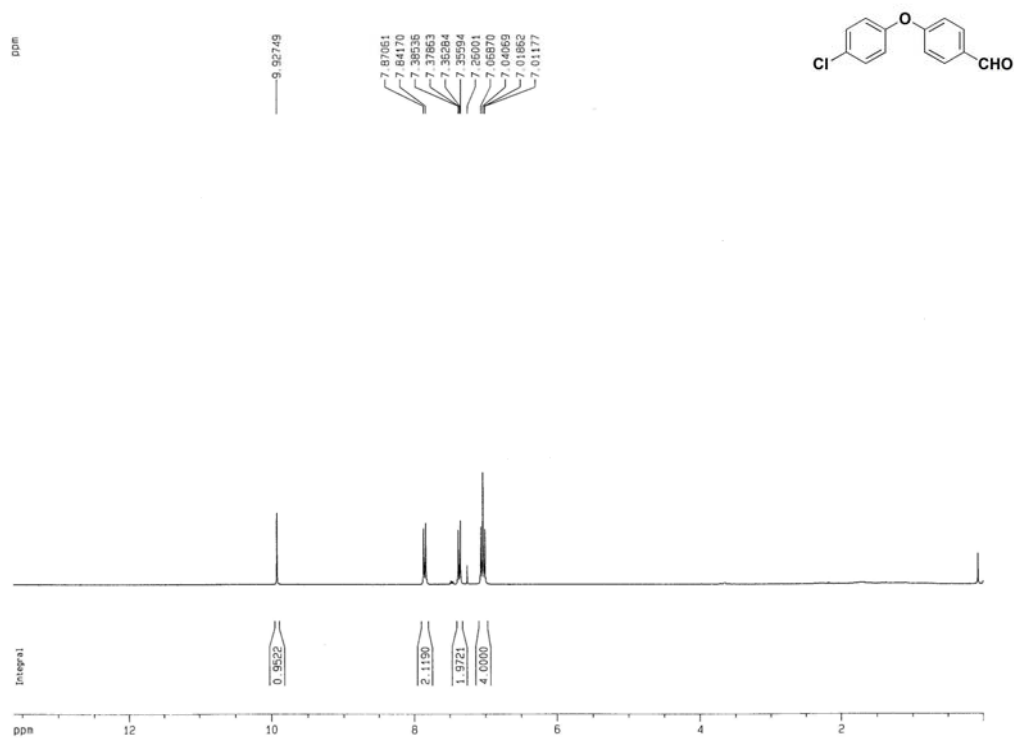

**Figure S11.** <sup>1</sup>H NMR of **3h** (300 MHz, CDCl<sub>3</sub>) and <sup>13</sup>C NMR of **3h** (125 MHz, CDCl<sub>3</sub>).

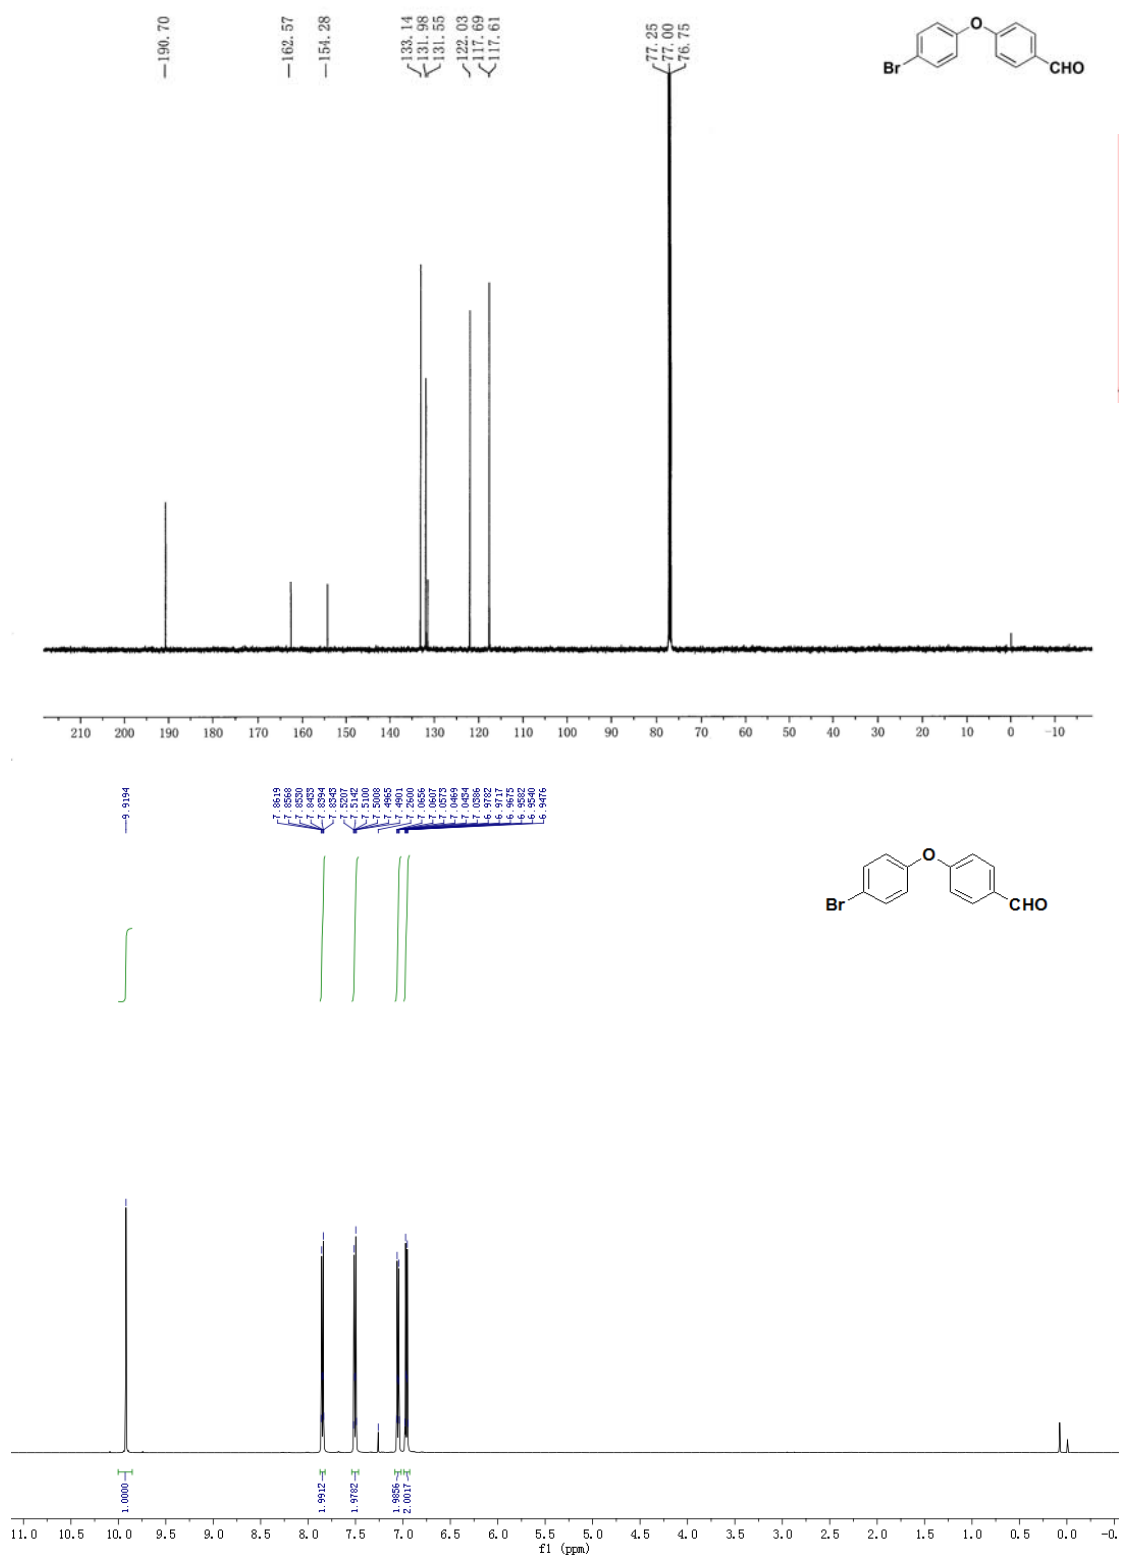

**Figure S12.** <sup>1</sup>H NMR of **3i** (500 MHz, CDCl<sub>3</sub>) and <sup>13</sup>C NMR of **3i** (125 MHz, CDCl<sub>3</sub>).

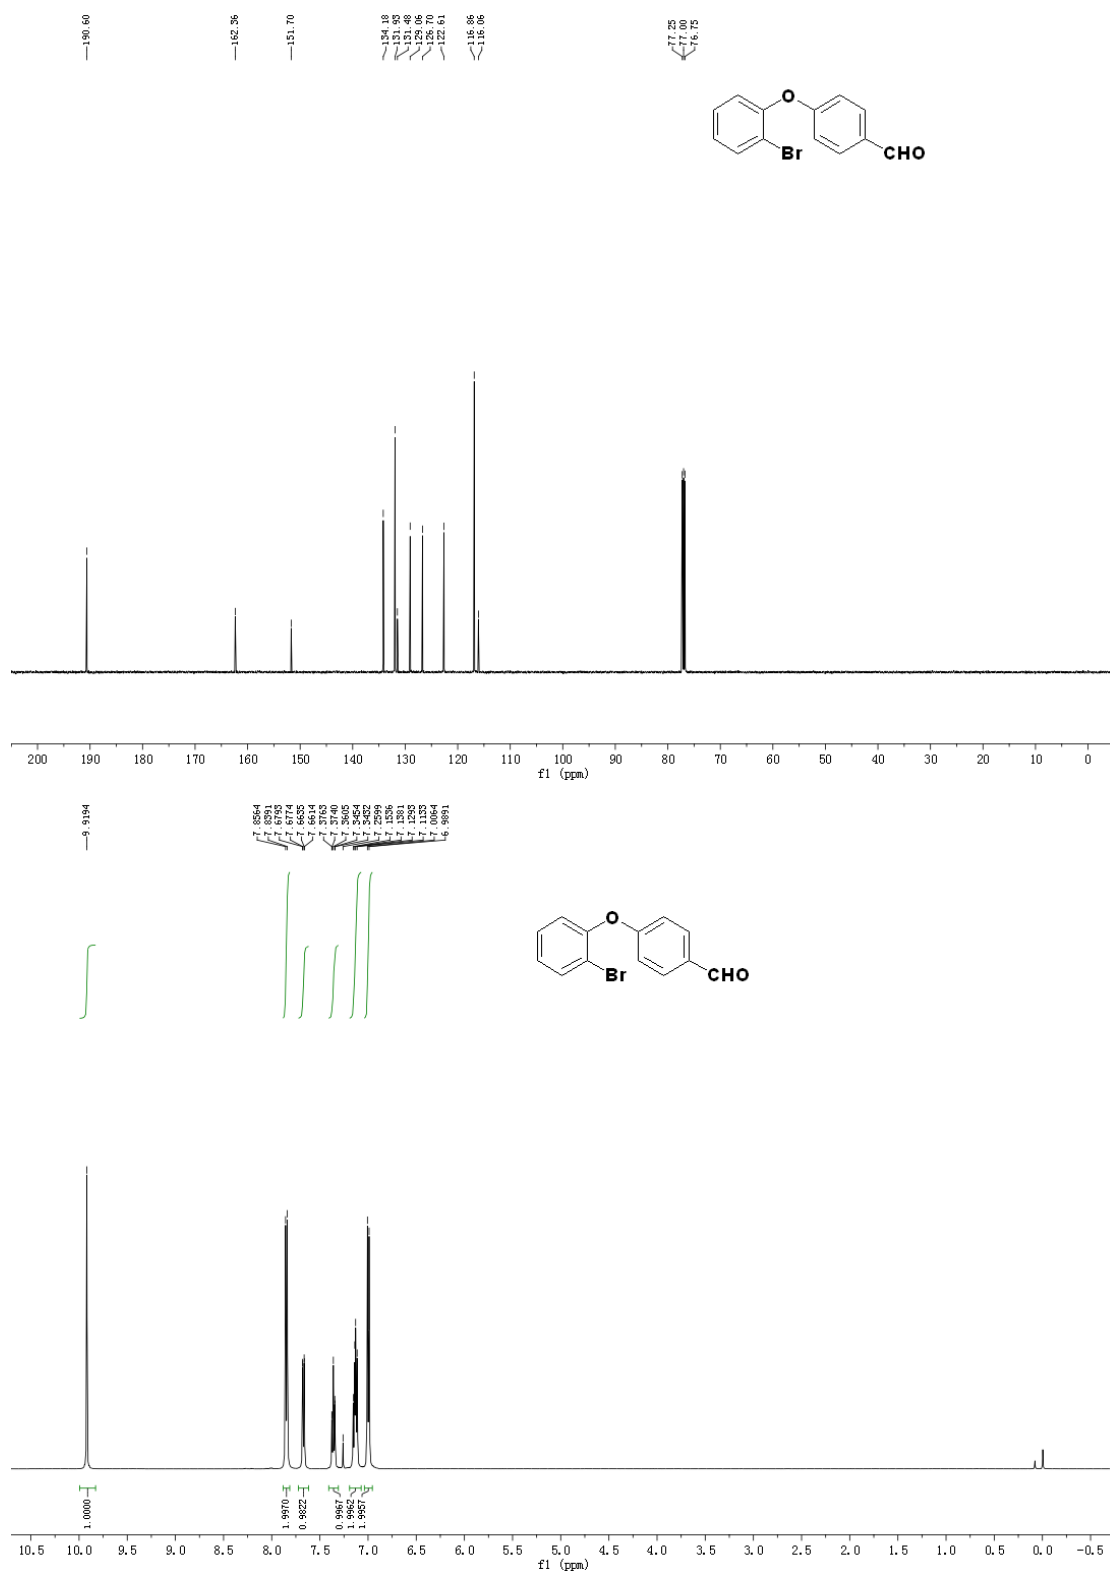

**Figure S13.** <sup>1</sup>H NMR of **3j** (500 MHz, CDCl<sub>3</sub>) and <sup>13</sup>C NMR of **3j** (125 MHz, CDCl<sub>3</sub>).



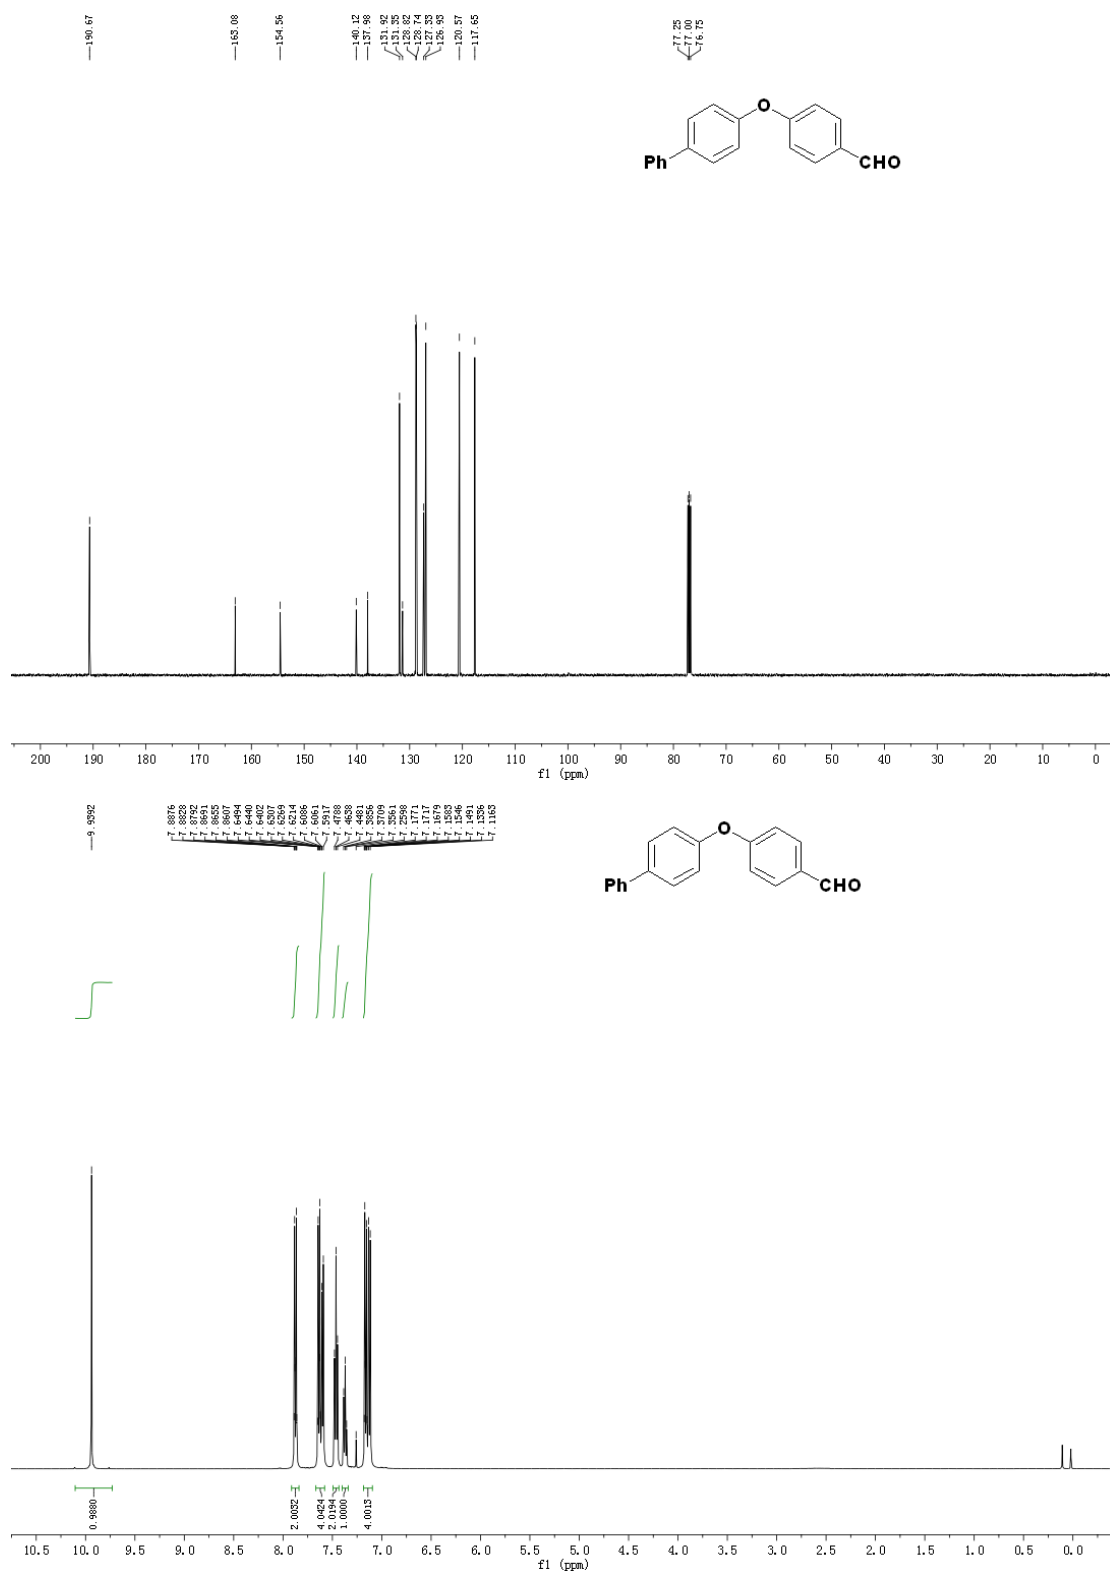

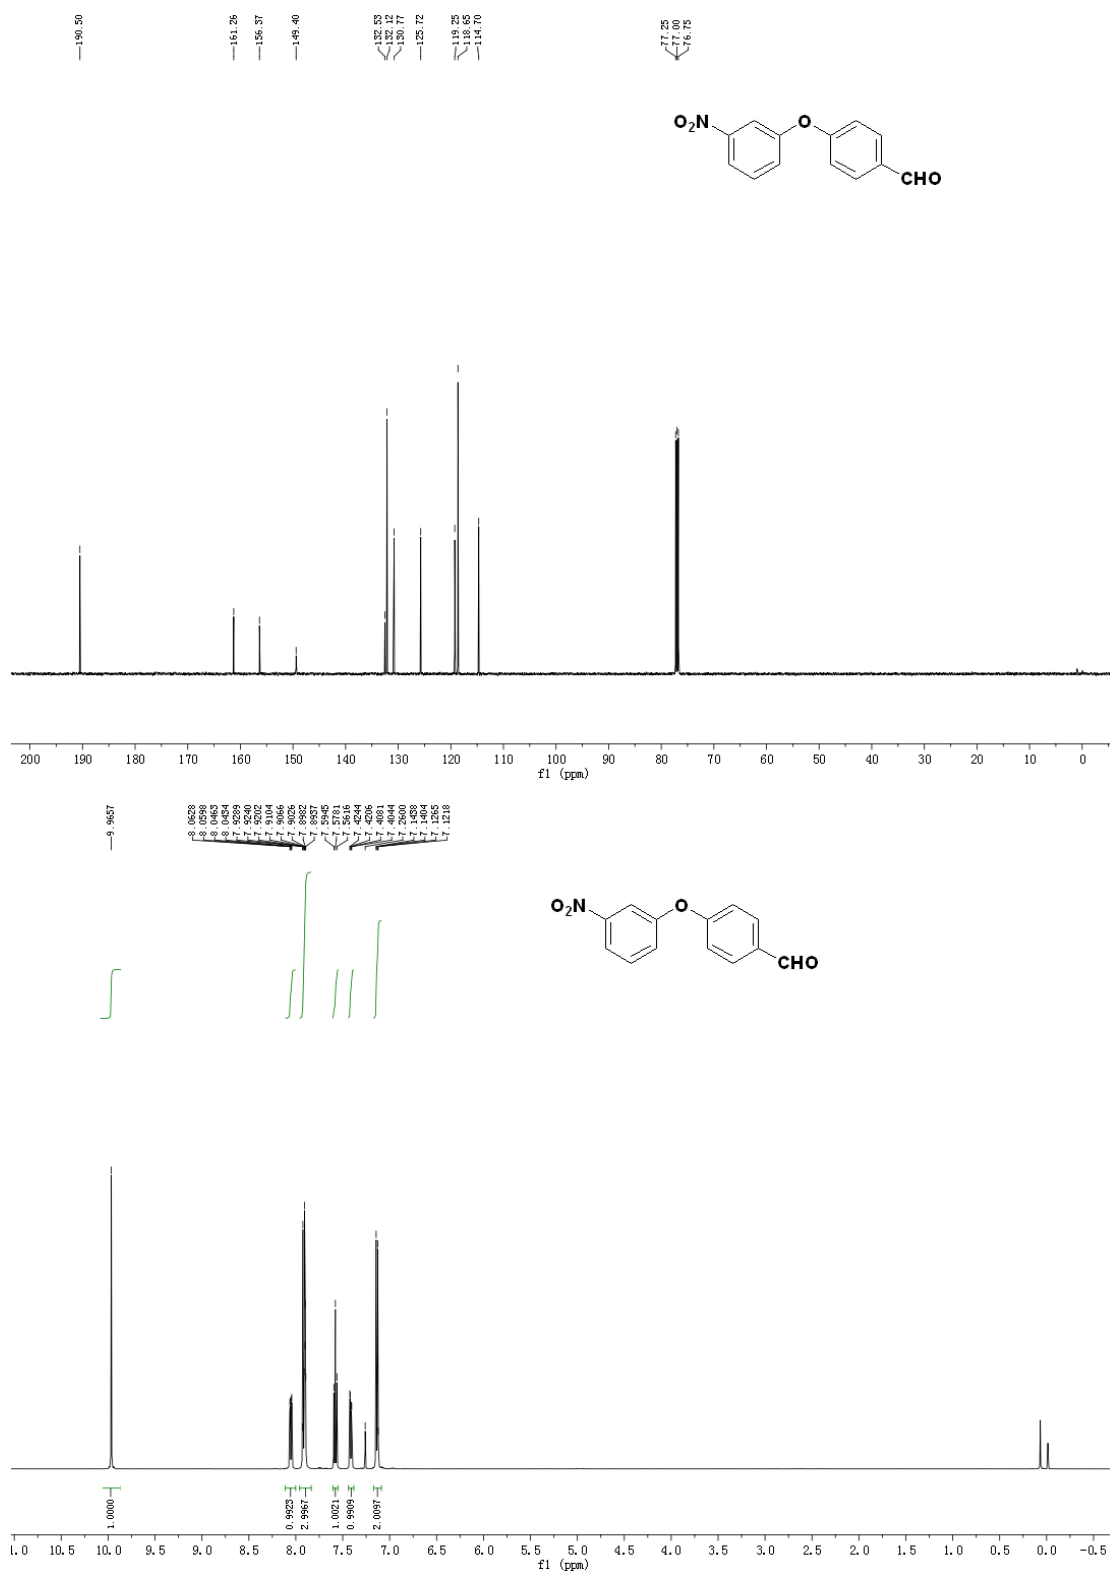

**Figure S15.** <sup>1</sup>H NMR of **31** (500 MHz, CDCl<sub>3</sub>) and <sup>13</sup>C NMR of **31** (125 MHz, CDCl<sub>3</sub>).

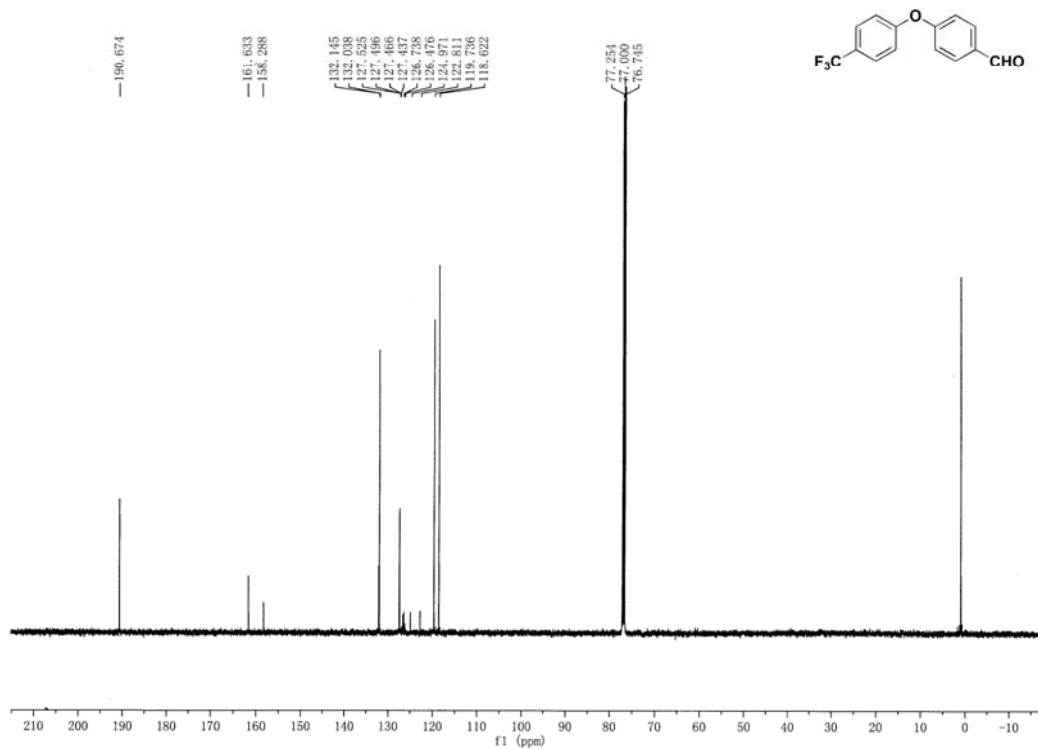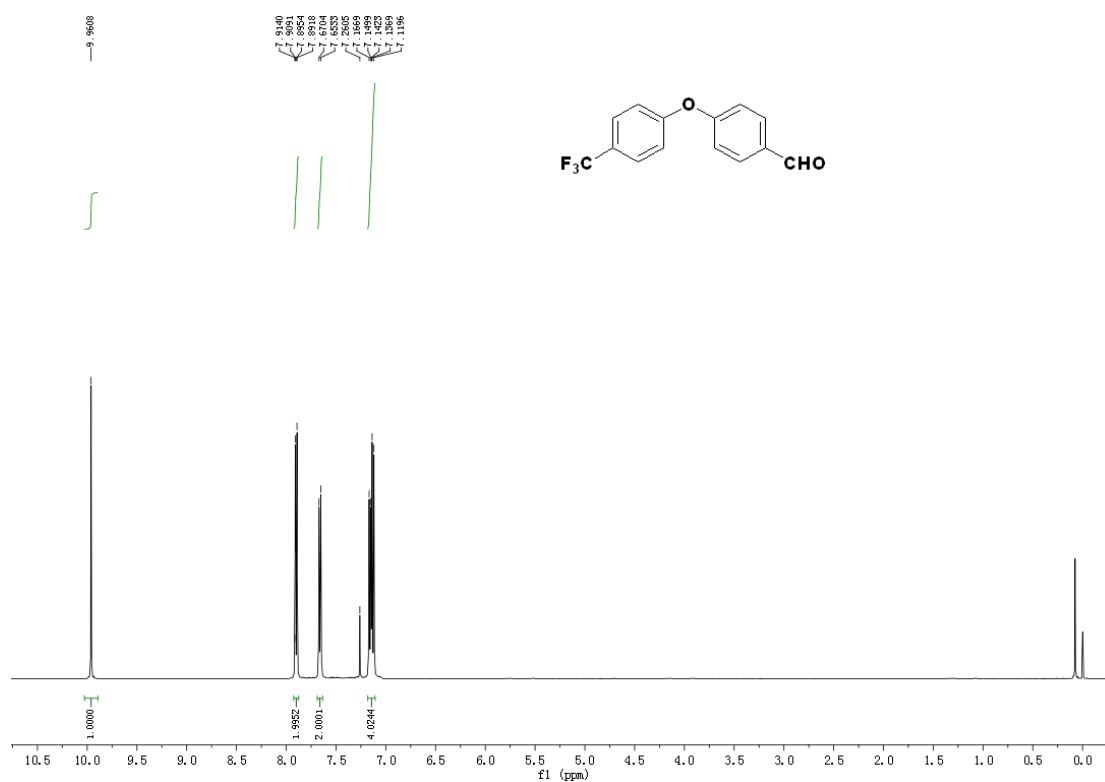

Figure S16. <sup>1</sup>H NMR of 3m (500 MHz, CDCl<sub>3</sub>) and <sup>13</sup>C NMR of 3m (125 MHz, CDCl<sub>3</sub>).

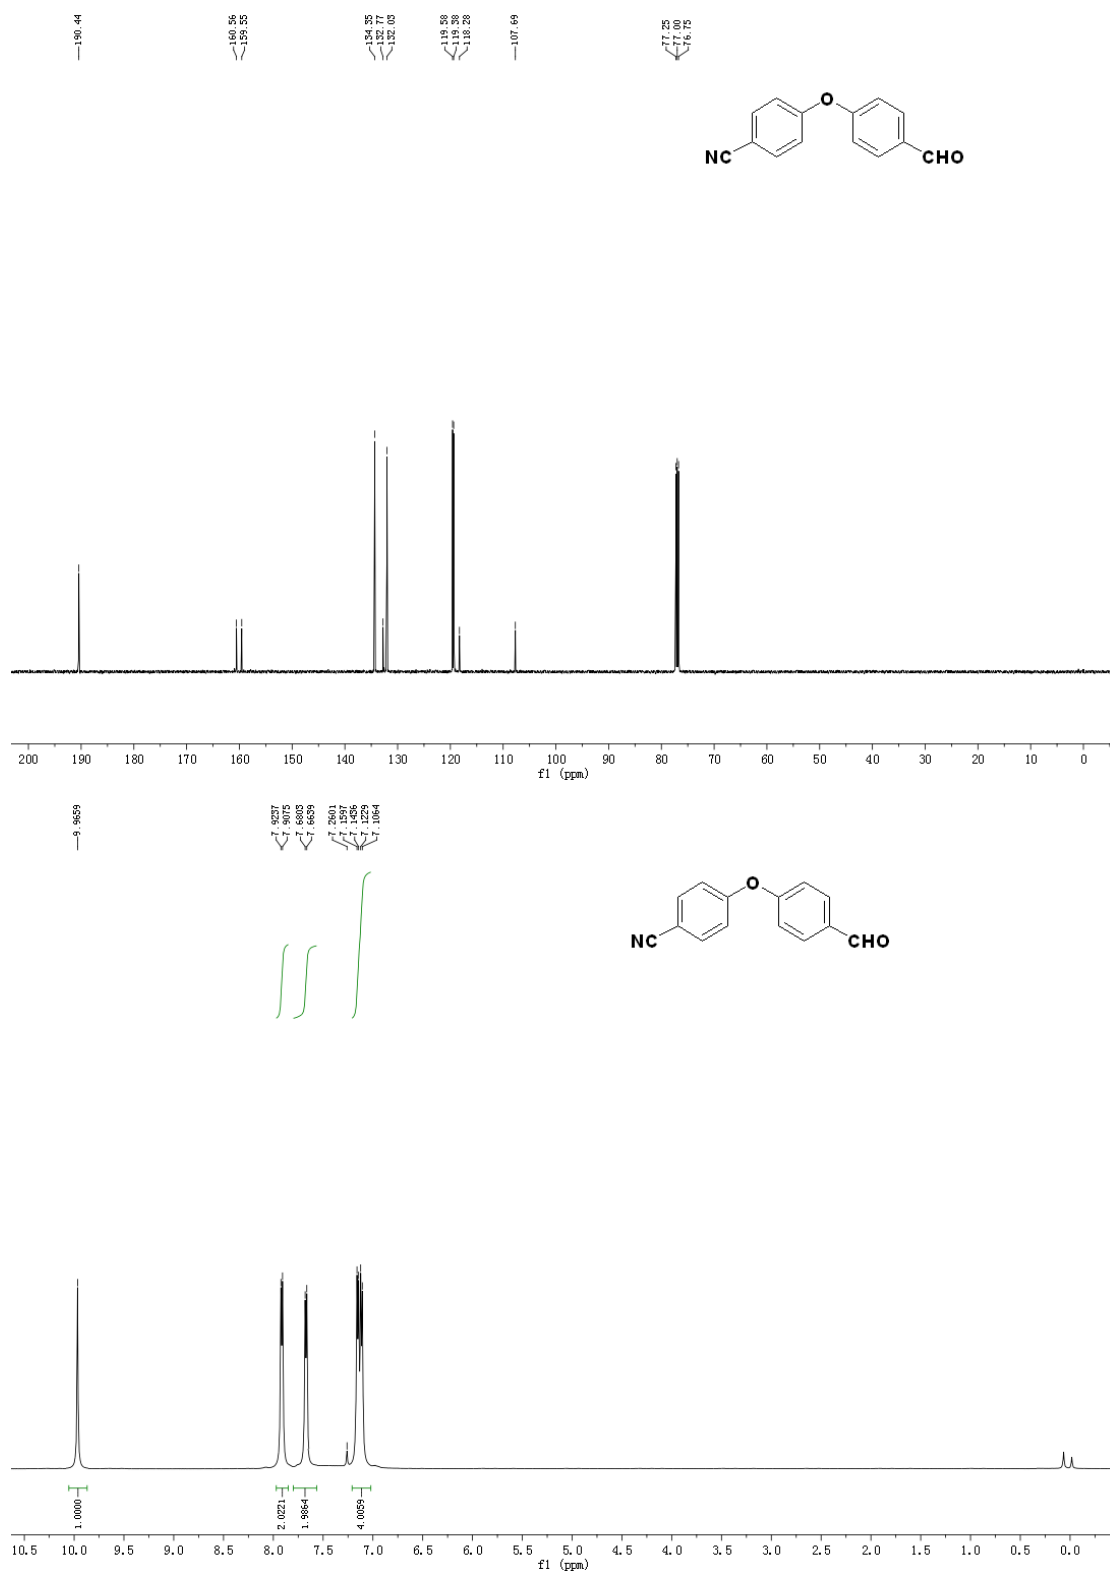

Figure S17. <sup>1</sup>H NMR of **3n** (500 MHz, CDCl<sub>3</sub>) and <sup>13</sup>C NMR of **3n** (125 MHz, CDCl<sub>3</sub>).

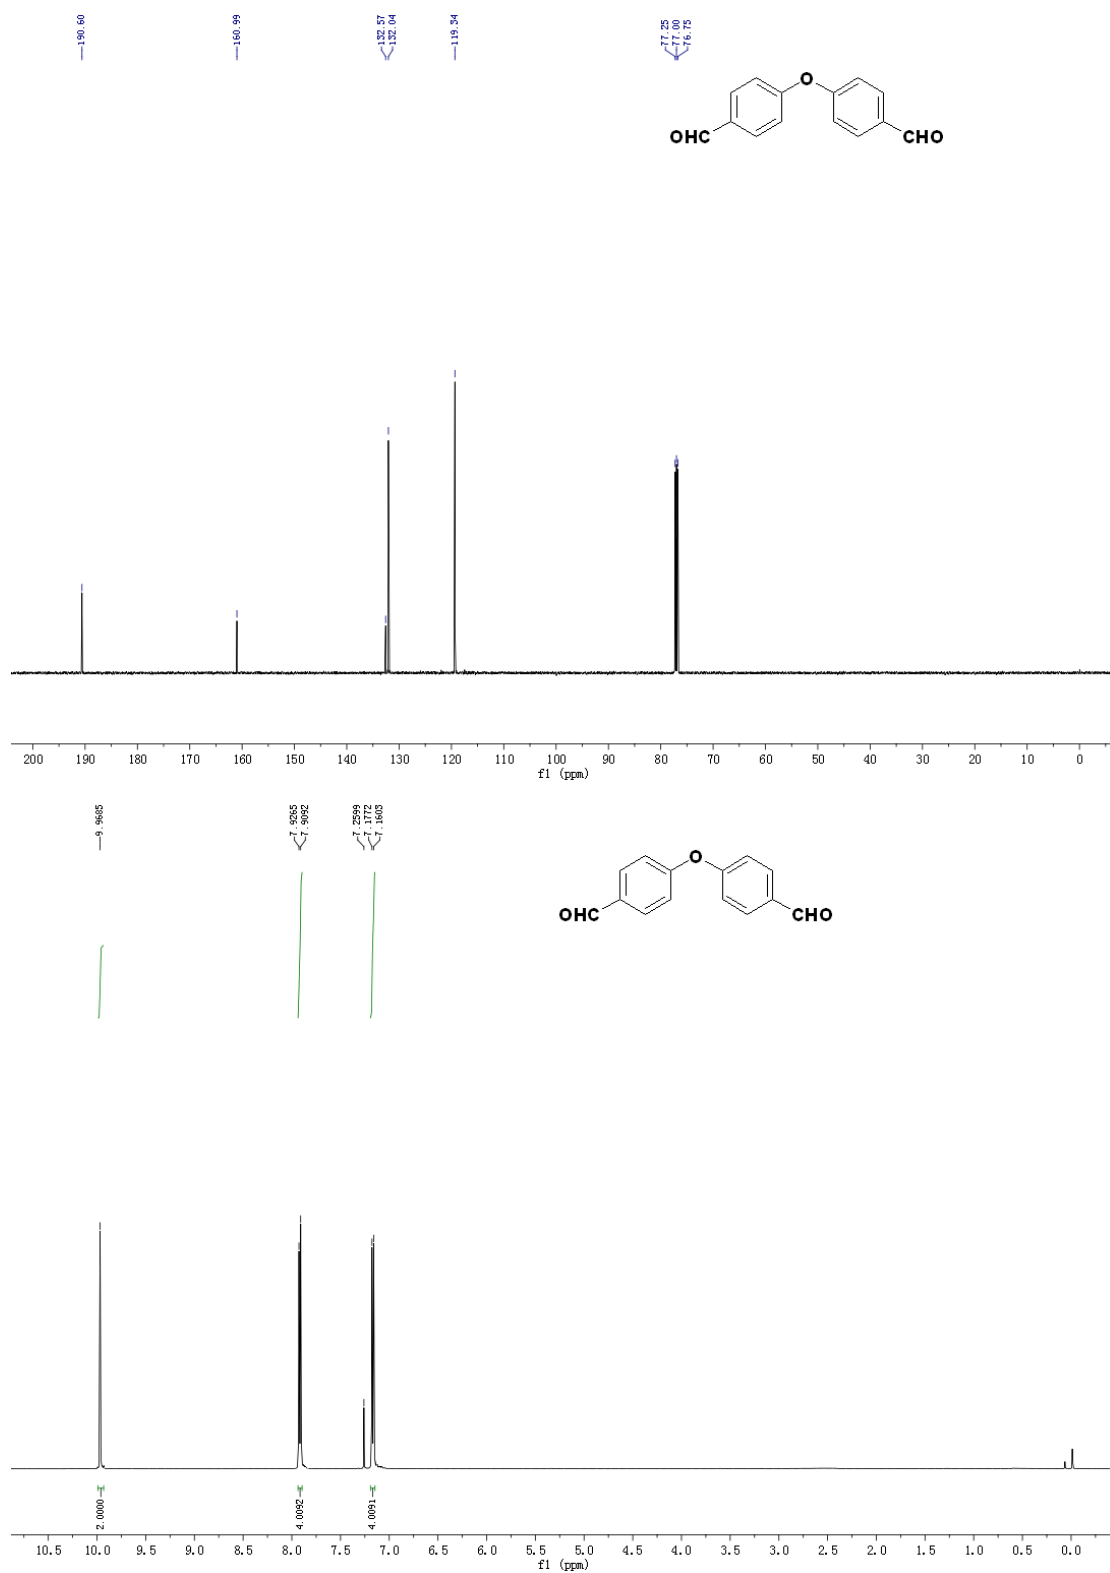

Figure S18. <sup>1</sup>H NMR of **3o** (500 MHz, CDCl<sub>3</sub>) and <sup>13</sup>C NMR of **3o** (125 MHz, CDCl<sub>3</sub>).

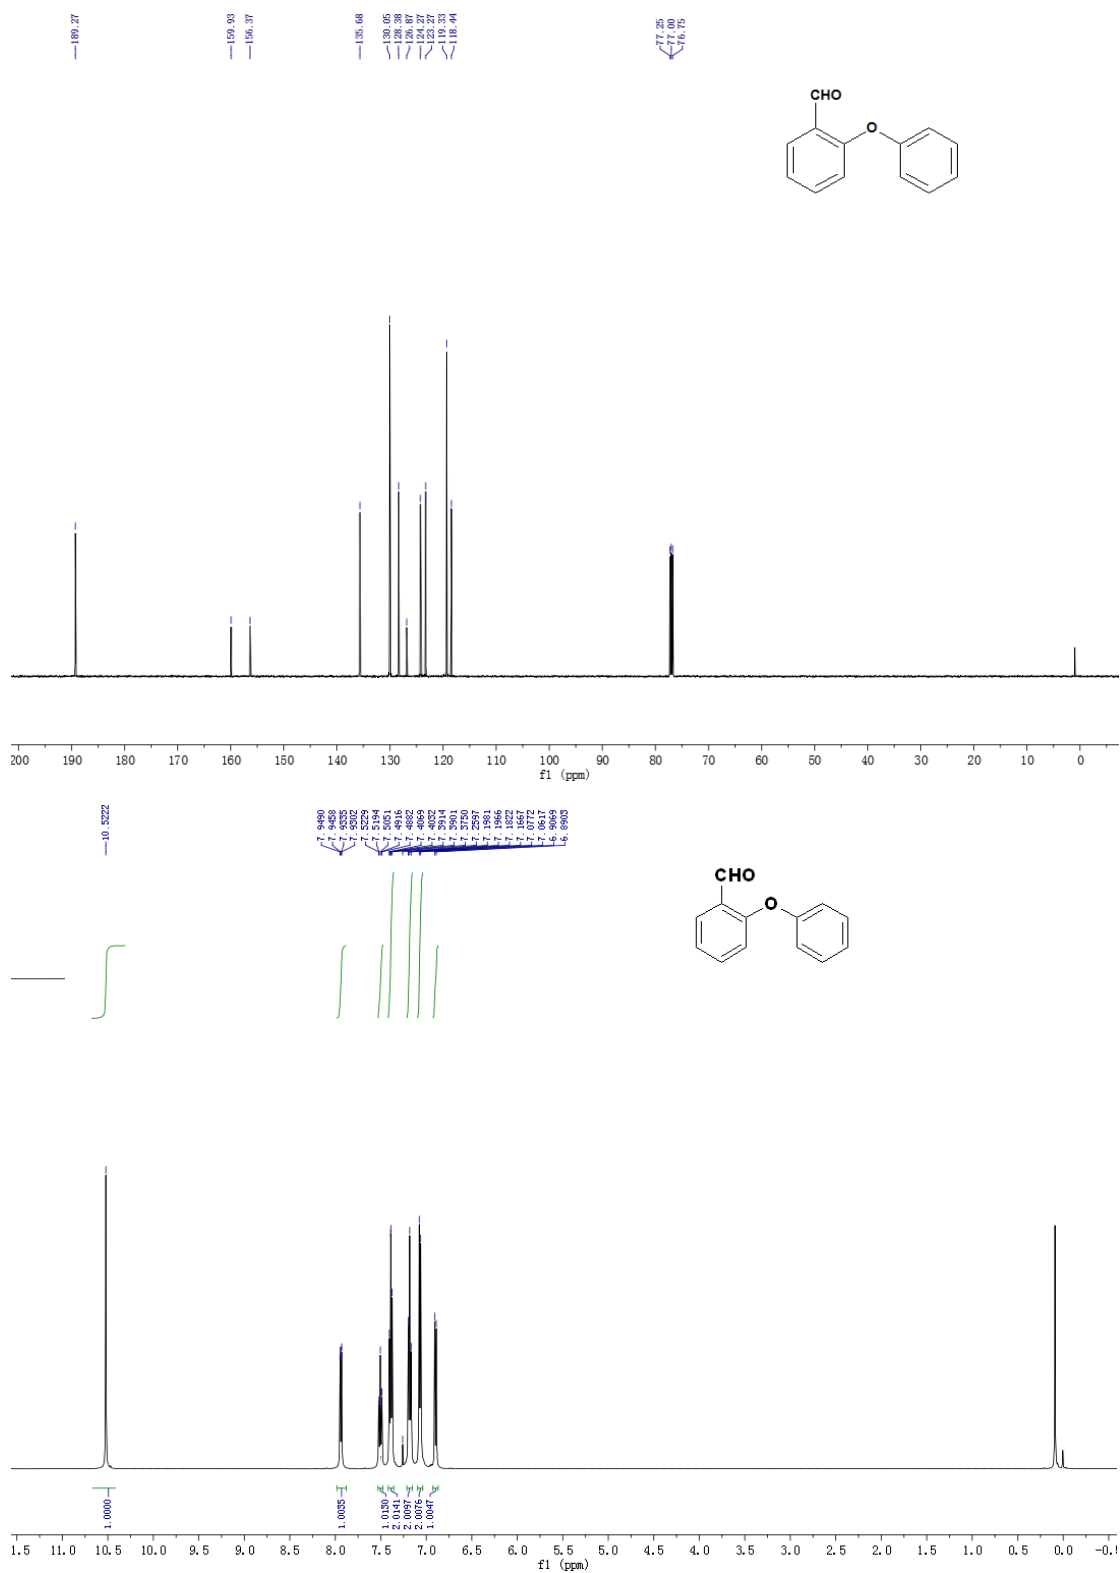

Figure S19. <sup>1</sup>H NMR of **3p** (500 MHz, CDCl<sub>3</sub>) and <sup>13</sup>C NMR of **3p** (125 MHz, CDCl<sub>3</sub>).

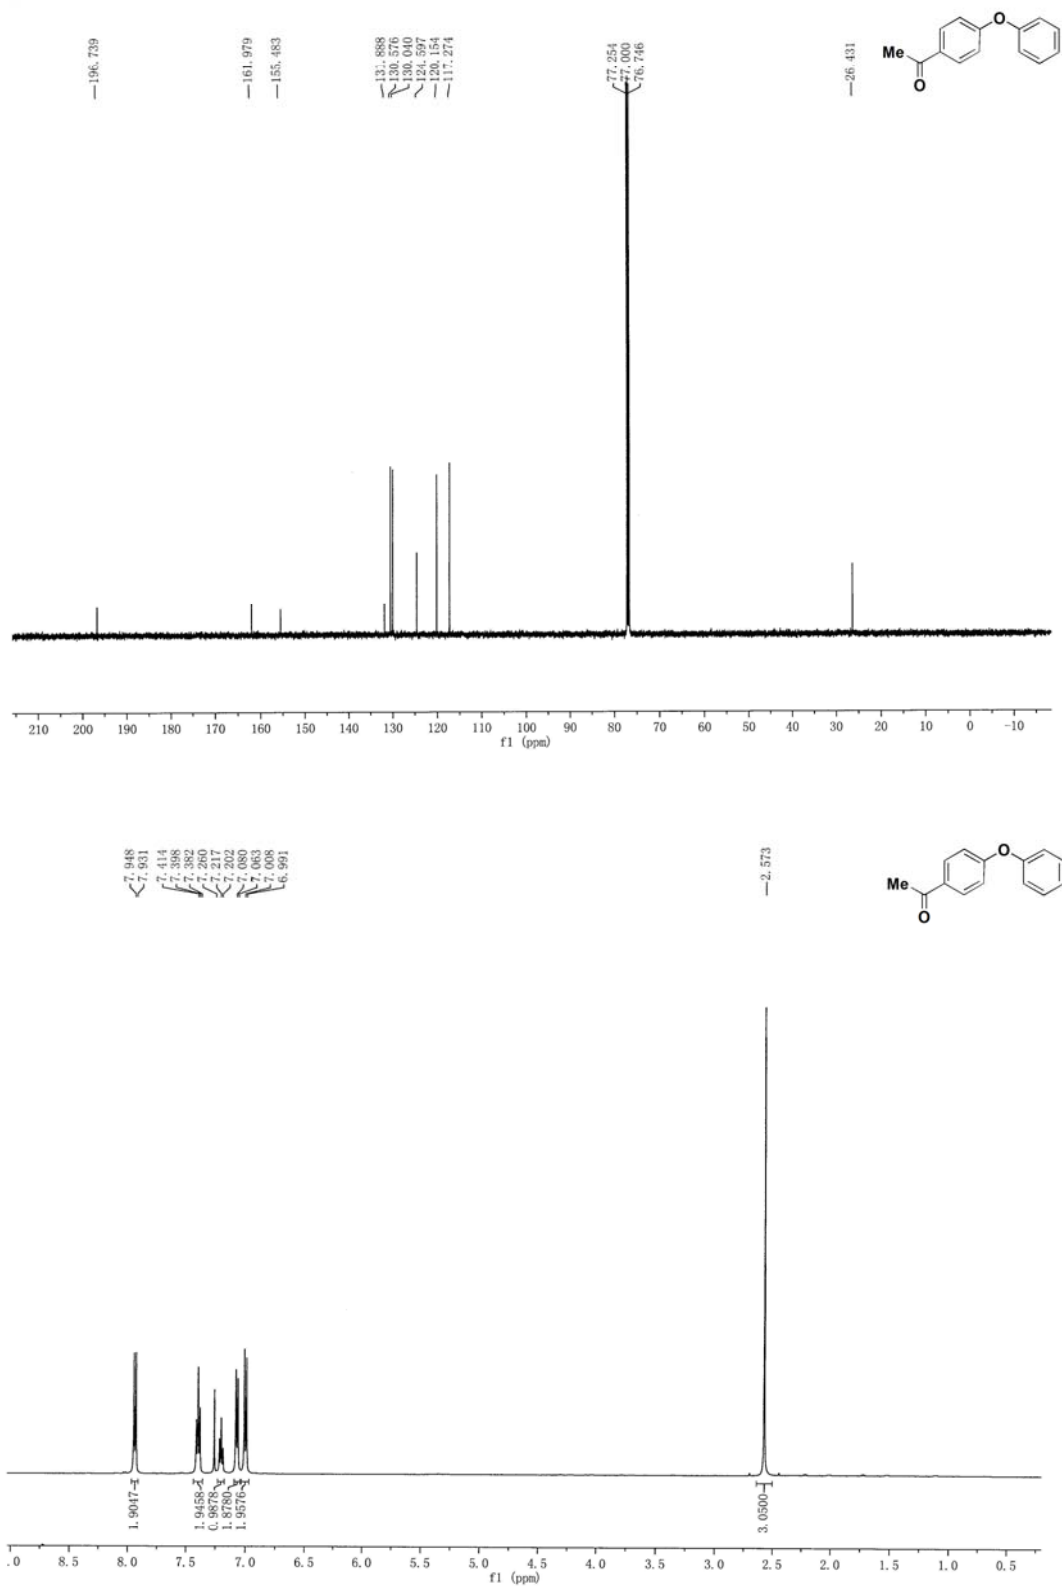

**Figure 20.**  $^1\text{H}$  NMR of **3q** (500 MHz,  $\text{CDCl}_3$ ) and  $^{13}\text{C}$  NMR of **3q** (125 MHz,  $\text{CDCl}_3$ ).

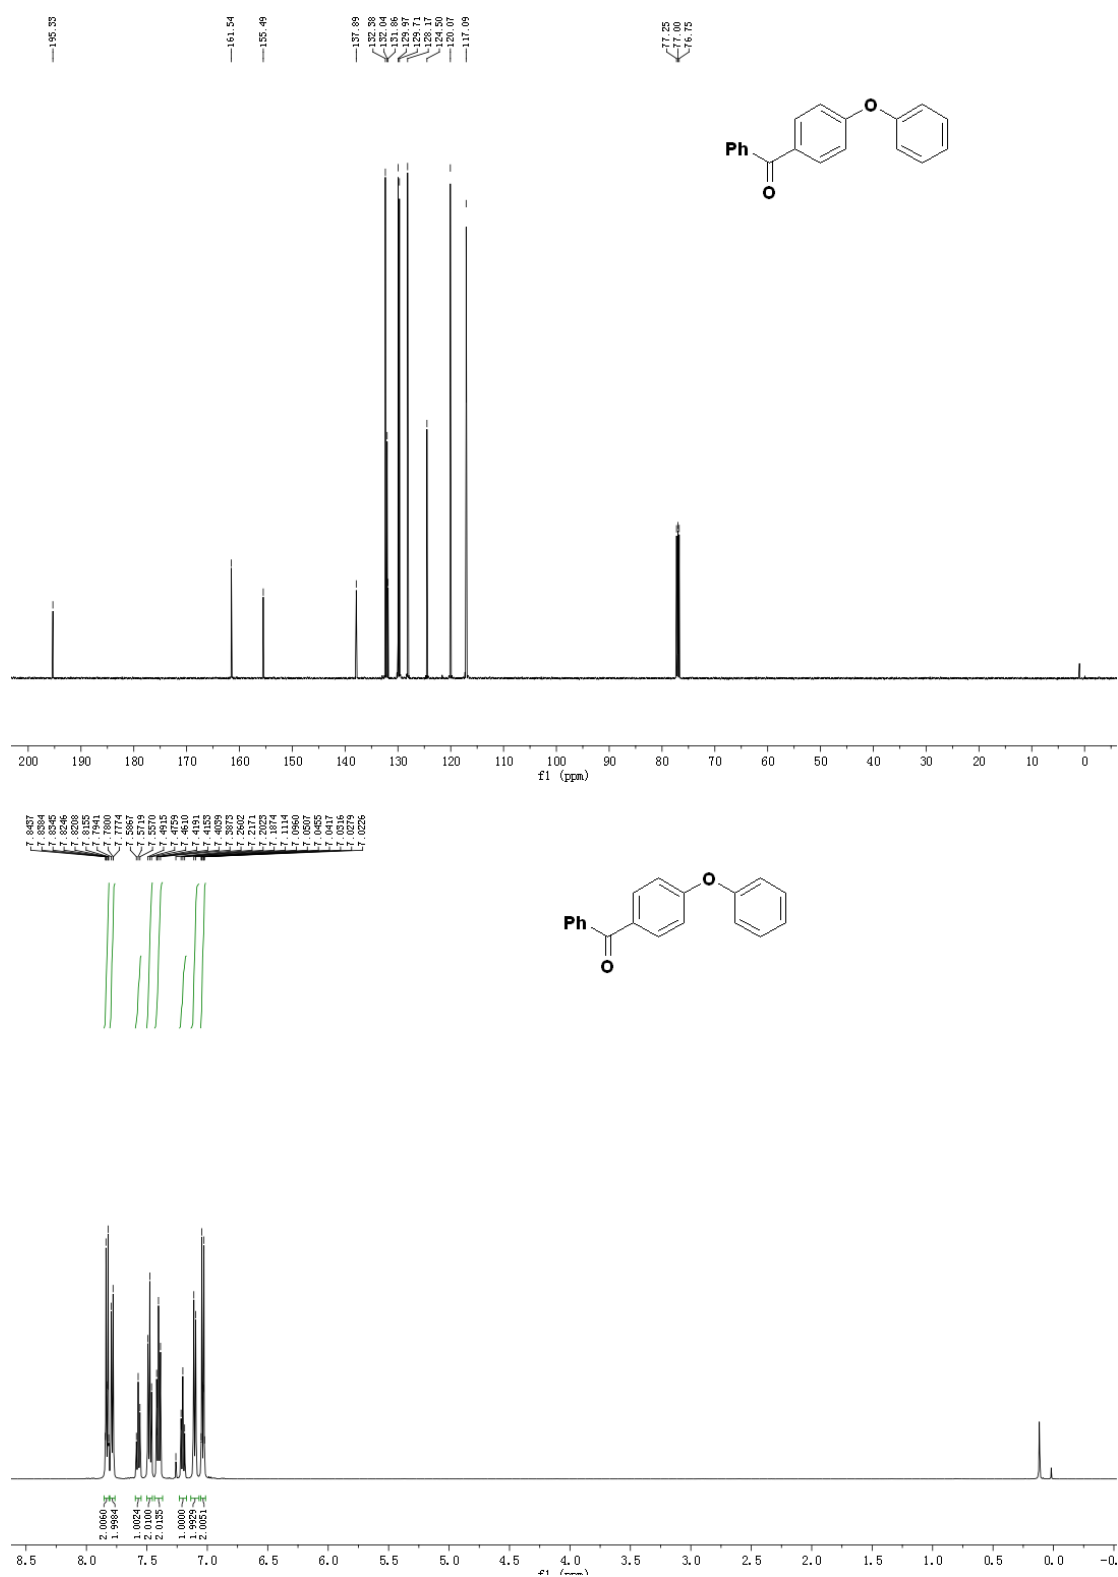

**Figure S21.** <sup>1</sup>H NMR of **3r** (500 MHz, CDCl<sub>3</sub>) and <sup>13</sup>C NMR of **3r** (125 MHz, CDCl<sub>3</sub>).





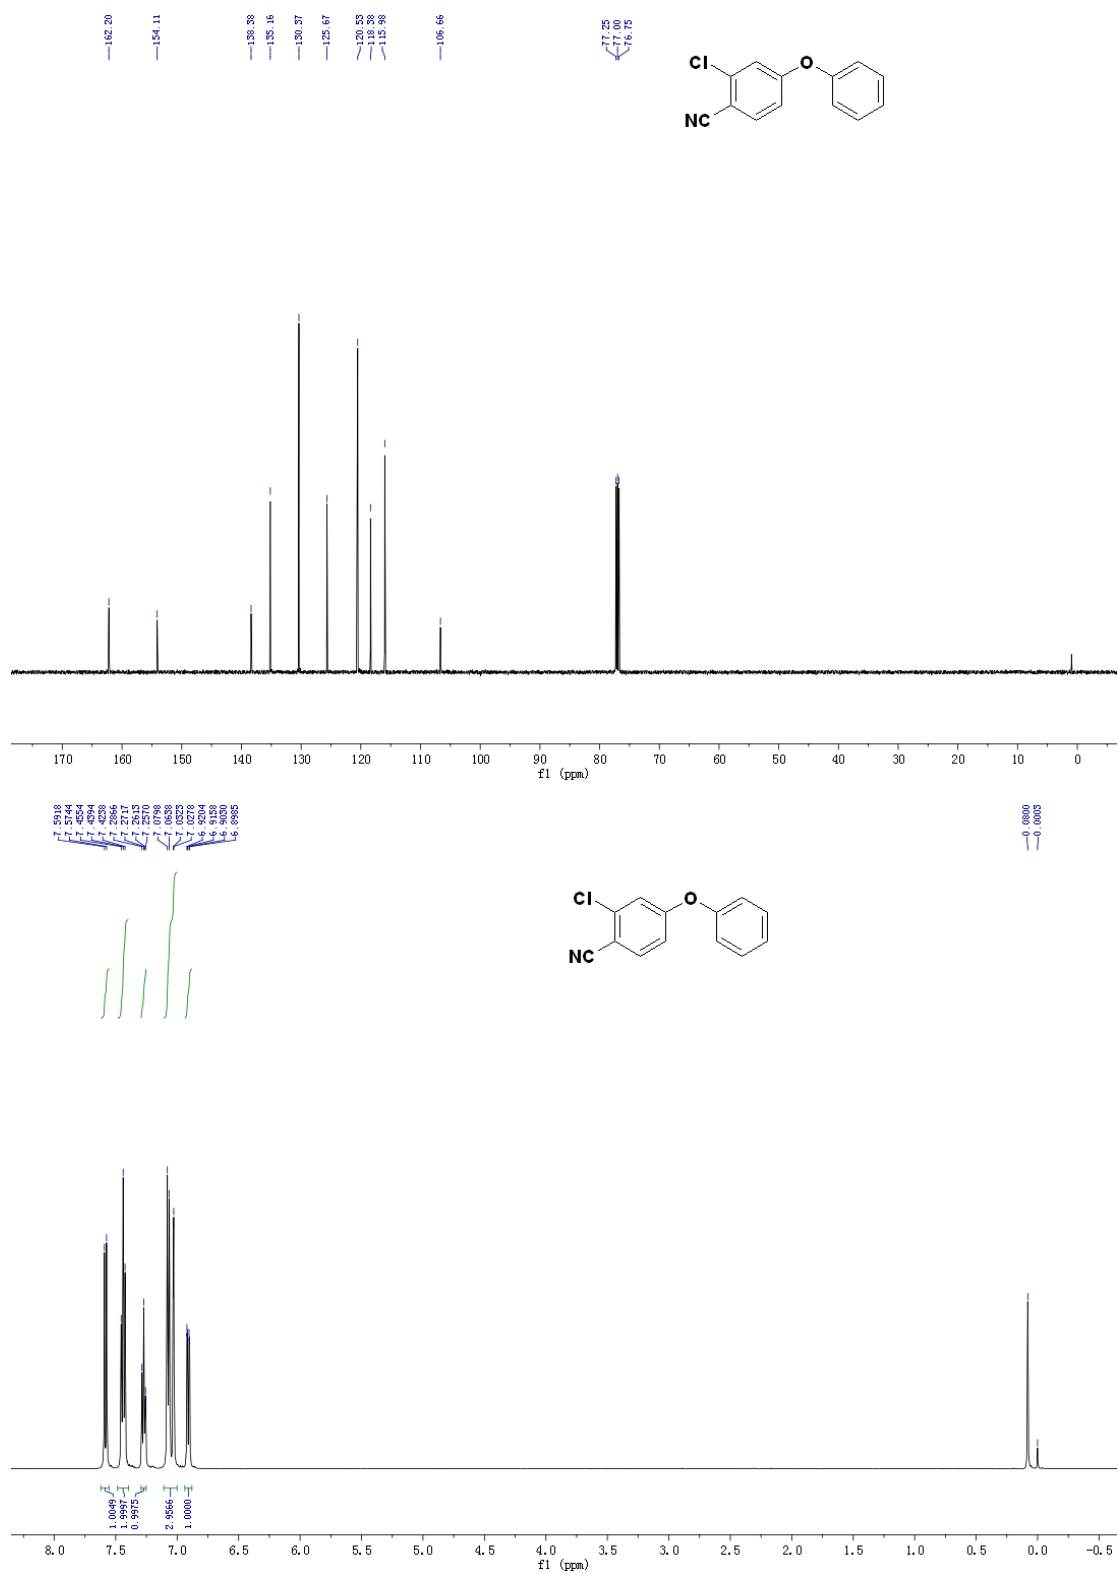

**Figure S23.** <sup>1</sup>H NMR of **3t** (500 MHz, CDCl<sub>3</sub>) and <sup>13</sup>C NMR of **3t** (125 MHz, CDCl<sub>3</sub>).

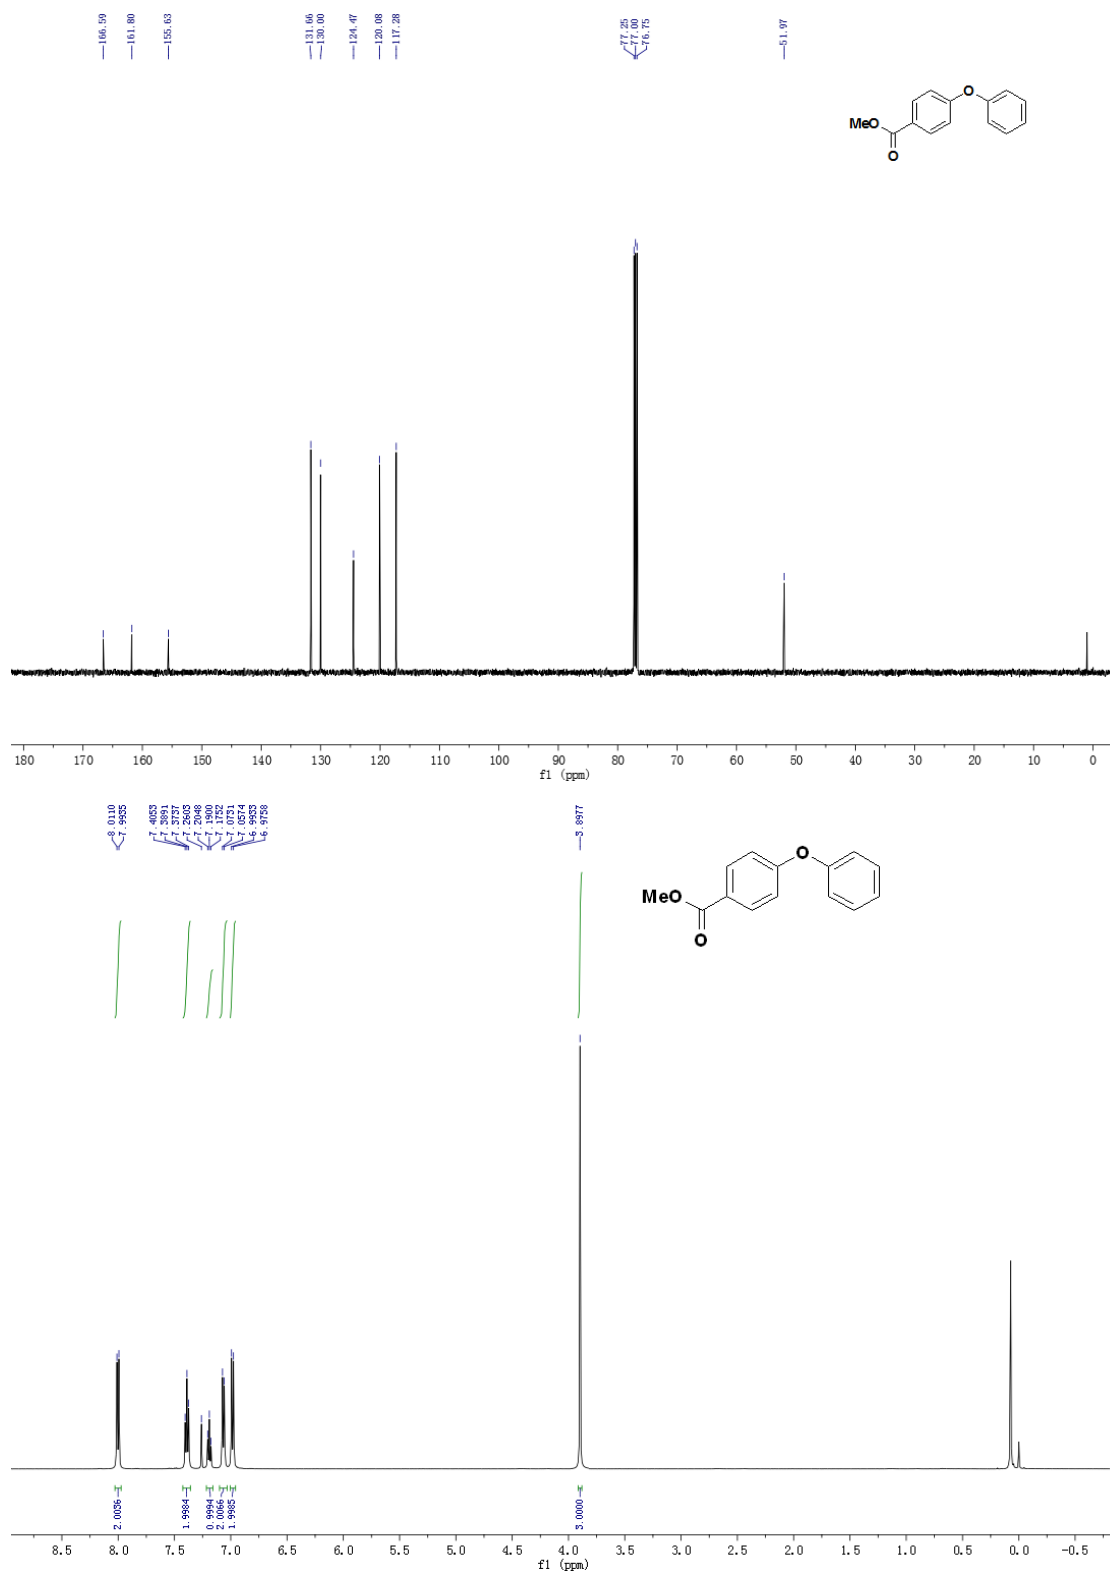

**Figure S24.** <sup>1</sup>H NMR of **3u** (500 MHz, CDCl<sub>3</sub>) and <sup>13</sup>C NMR of **3u** (125 MHz, CDCl<sub>3</sub>).

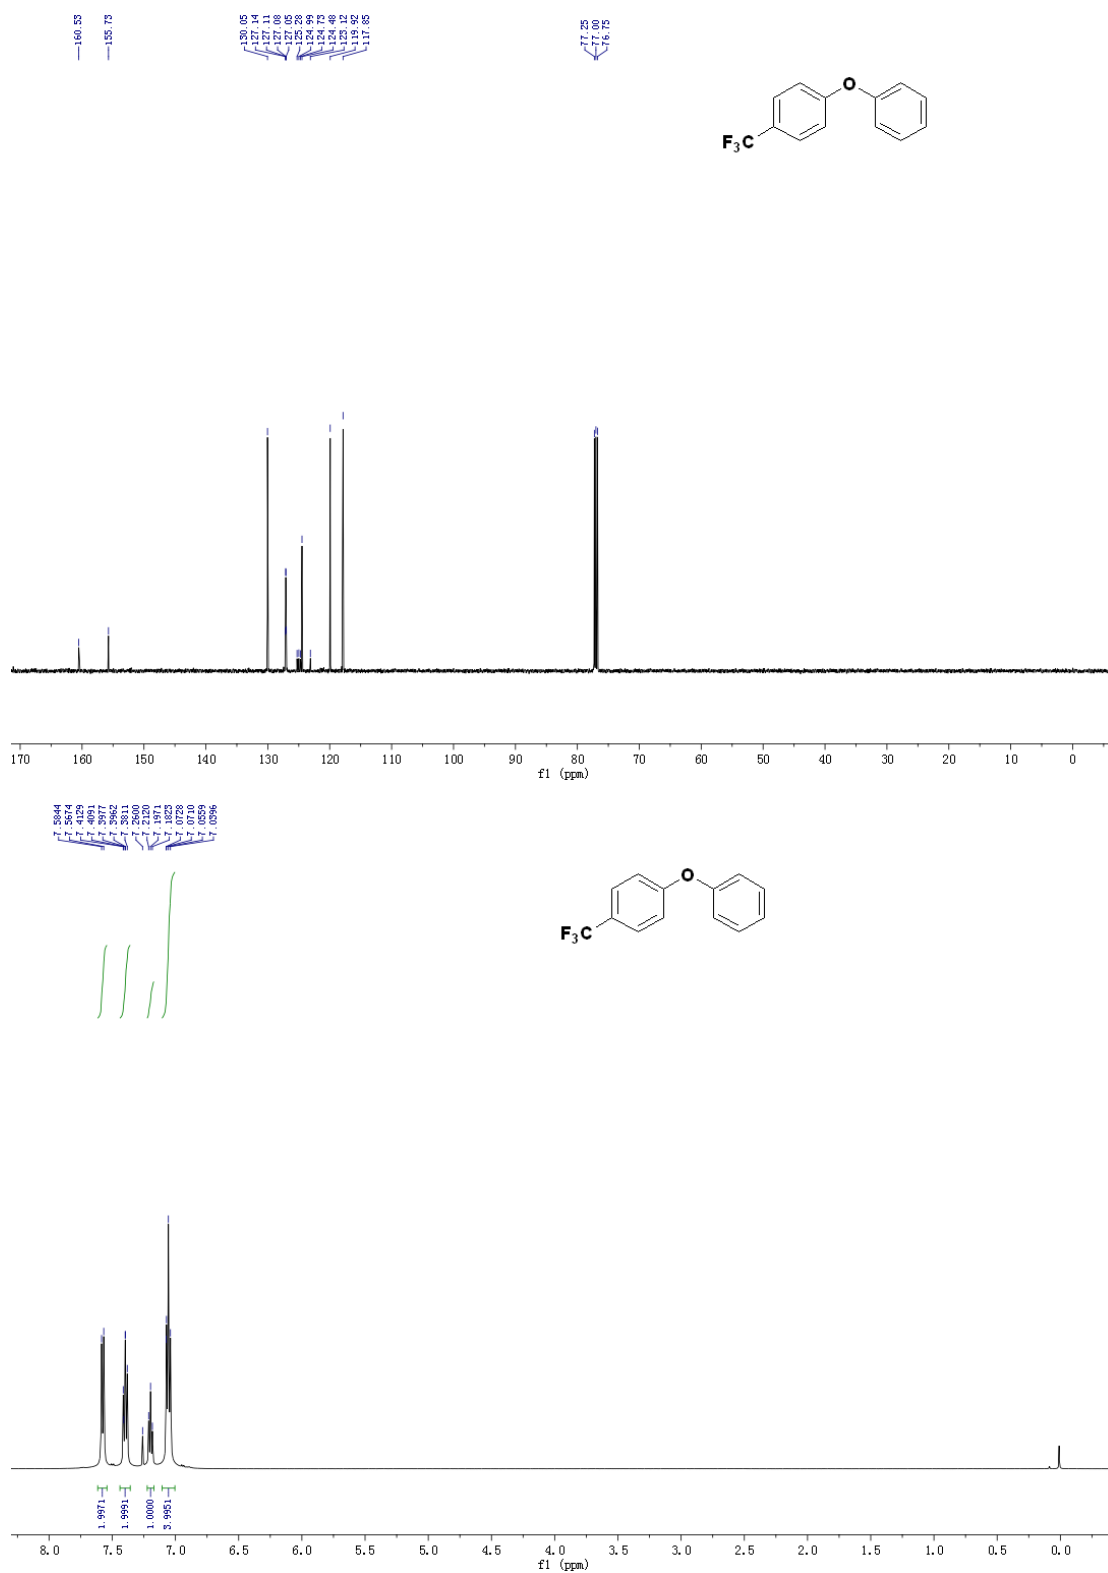

Figure S25.  $^1\text{H}$  NMR of 3v (500 MHz,  $\text{CDCl}_3$ ) and  $^{13}\text{C}$  NMR of 3v (125 MHz,  $\text{CDCl}_3$ ).

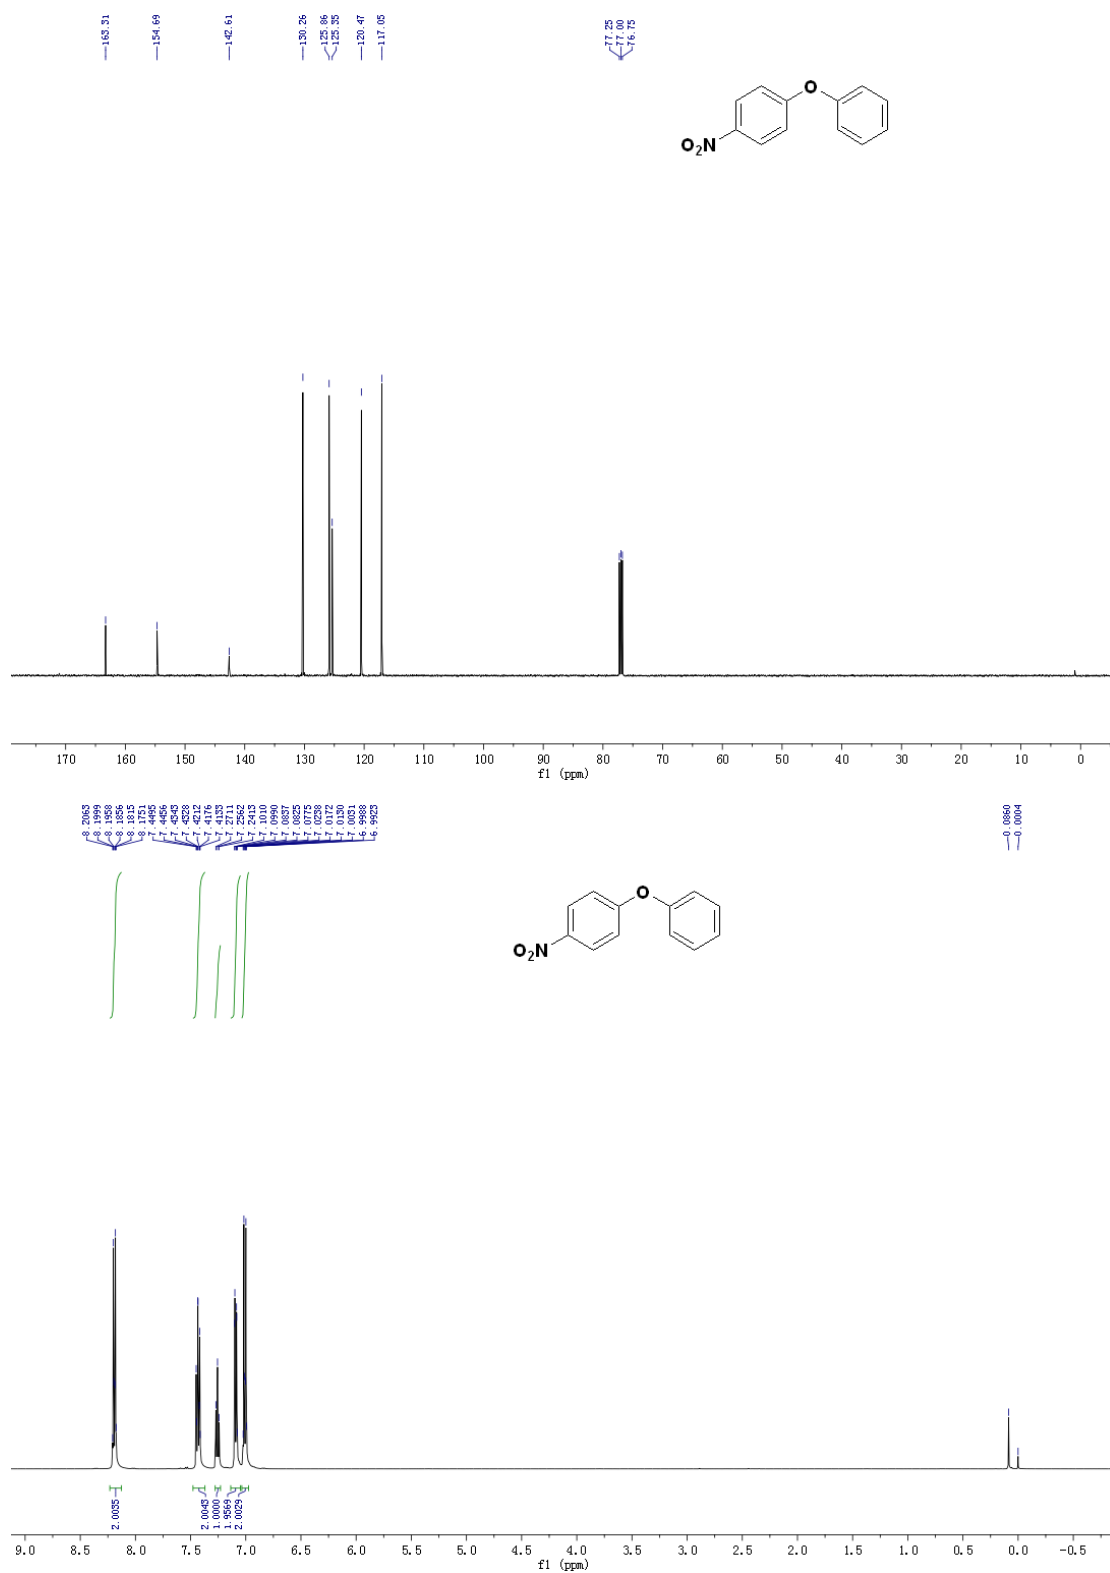

**Figure S26.** <sup>1</sup>H NMR of **3w** (500 MHz, CDCl<sub>3</sub>) and <sup>13</sup>C NMR of **3w** (125 MHz, CDCl<sub>3</sub>).

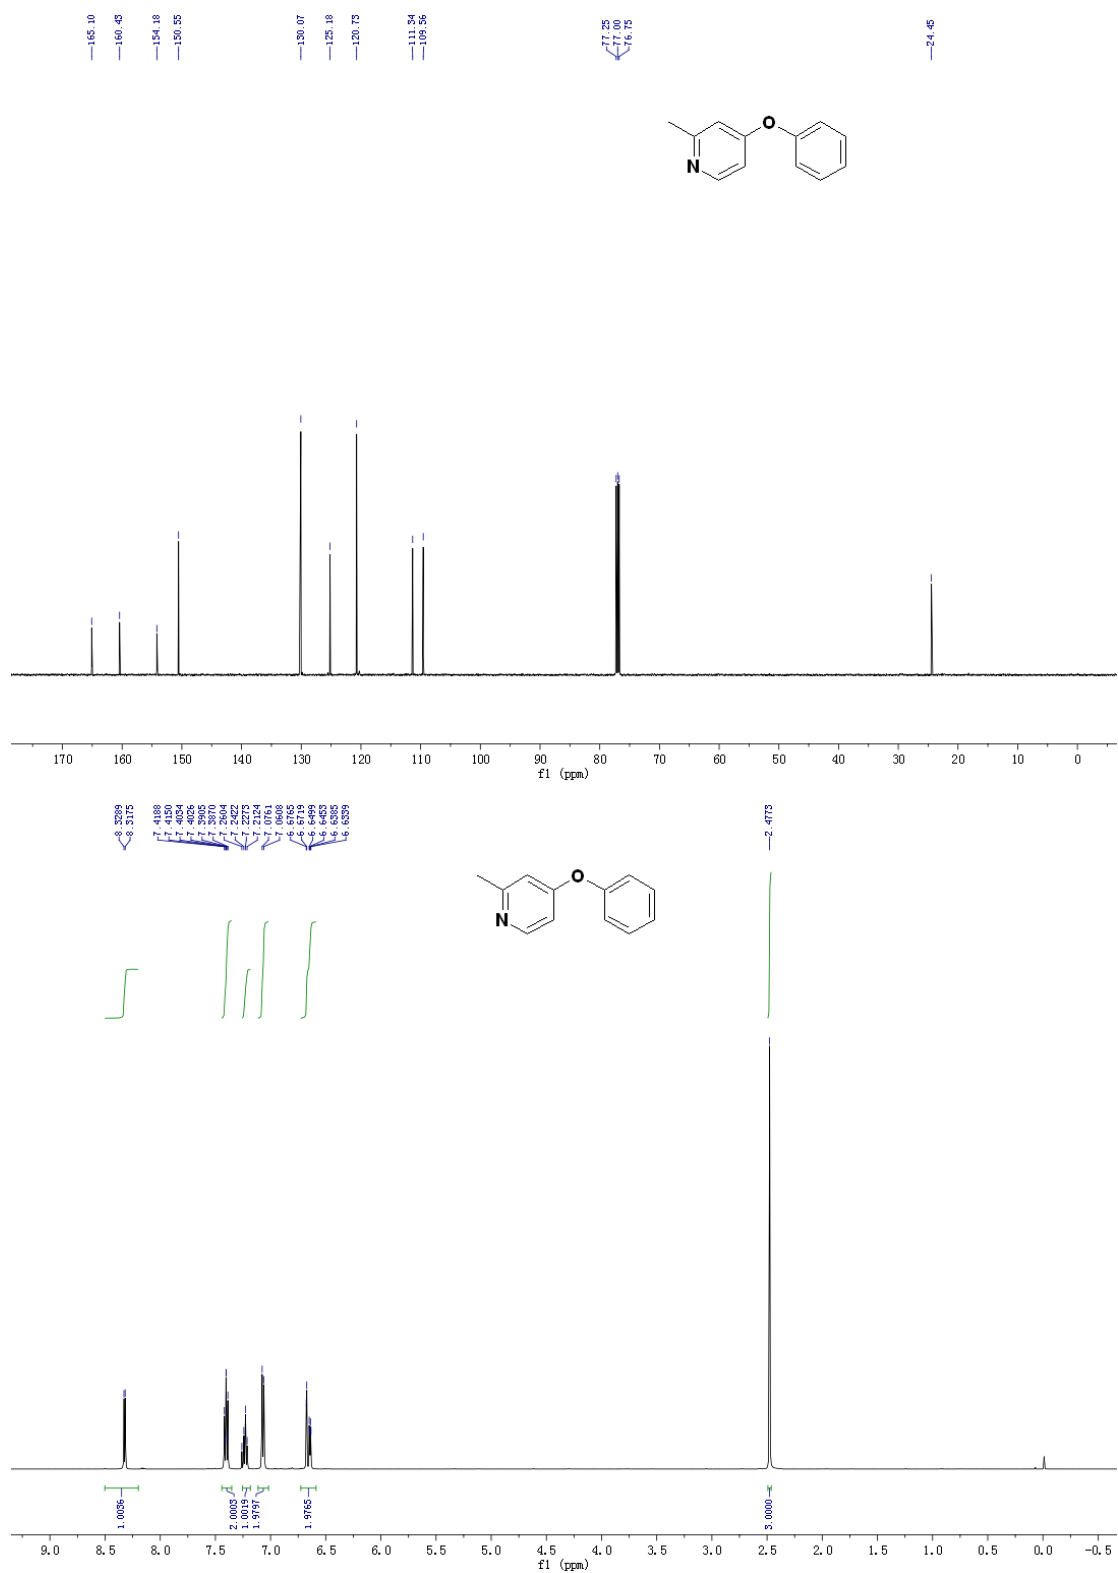

Figure S27. <sup>1</sup>H NMR of **3x** (500 MHz, CDCl<sub>3</sub>) and <sup>13</sup>C NMR of **3x** (125 MHz, CDCl<sub>3</sub>).
